# Supplementary material for: Antidiabetic and cardiovascular beneficial effects of a liver-localized mitochondrial uncoupler
Source: PubMed Central journal article supplement (PMC6520346; doi:10.1038/s41467-019-09911-6), 2019-05-15
Supplement: 41467_2019_9911_MOESM1_ESM.pdf [file 41467_2019_9911_MOESM1_ESM.pdf]

**Supplementary information for  
Antidiabetic and cardiovascular beneficial effects of a liver-localized mitochondrial  
uncoupler**

**Kanemoto et al.**

## **Table of Contents**

### **Supplementary Figures**

Supplementary Figure 1: In vitro activity of OPC-163493 related to mUncoupling and a mitochondrial swelling assay using FCCP.

Supplementary Figure 2: PK and QWBA studies.

Supplementary Figure 3: Effects of OPC-163493 in multiple animal models.

Supplementary Figure 4: Blood glucose levels during hyperinsulinemic-euglycemic clamp test.

Supplementary Figure 5: Metabolomic analysis of in vivo effects of OPC-163493 in ZDF rats.

Supplementary Figure 6: Beneficial effects of OPC-163493 in salt-loaded SHRSPs.

Supplementary Figure 7: Isometric tension recordings obtained from rat thoracic aortas.

Supplementary Figure 8: Efficacy and toxicity of OPC-163493 in rats.

Supplementary Figure 9: Schemes of compound injections and OCR, CDER and ECAR measuring points.

### **Supplementary Tables**

Supplementary Table 1: Radioactivity in tissues after single oral administration of [14C]-OPC-163493 suspension at 1 mg/kg to male rats by QWBA method

Supplementary Table 2: Radioactivity in tissues after single oral administration of [14C]-OPC-163493 suspension at 1 mg/kg to Day 17 pregnancy rats by QWBA method

Supplementary Table 3: Pharmacokinetic parameters of radioactivity in the plasma and liver following single oral administration of 1 mg/kg 14C-OPC-163493 in fasted male rats

Supplementary Table 4: HbA1c baseline of ZDF rats at the age of 11 weeks

Supplementary Table 5: Pharmacokinetic parameters of OPC-163493 in ZDF rats

Supplementary Table 6: HbA1c baseline of Akita mice at the age of 6 weeks

Supplementary Table 7: The Diurnal change of plasma OPC-163493 concentrations in Akita mice following 6-week dietary administration

Supplementary Table 8: HbA1c baseline of ZDF rats at the age of 27 weeks

Supplementary Table 9: Pharmacokinetic parameters of OPC-163493 in old ZDF rats

Supplementary Table 10: Plasma OPC-163493 concentrations at 6 AM in OLETF rats following 1-week dietary administration

Supplementary Table 11: The diurnal change of plasma OPC-163493 concentrations in ZDF(M) rats following 4-week dietary administration

Supplementary Table 12: HbA1c baseline of ob/ob mice at the age of 8 weeks

Supplementary Table 13: Plasma OPC-163493 concentrations at 6 AM in ob/ob mice following 10-week dietary administration

Supplementary Table 14: Lipidomic analysis of effects of OPC-163493 on hepatic lipids in HFD SD rats

Supplementary Table 15: Pharmacokinetic parameters of OPC-163493 in HDF SD rats

Supplementary Table 16: Long-term effect of OPC-163493 dosing with mixed chow on HbA1c values in male OLETF rats

Supplementary Table 17: Effects of OPC-163493 on hyperinsulinemic-euglycemic clamp parameters

Supplementary Table 18: Metabolomic analysis of in vitro effects of OPC-163493 in Hep G2 cells

Supplementary Table 19: Pharmacokinetic parameters of OPC-163493 in ZDF rats

Supplementary Table 20: Metabolomic analysis of in vivo effects of OPC-163493 in the liver of ZDF rats

Supplementary Table 21: Parameters of OPC-163493 intervention study in salt-loaded SHRSPs (1st exp.)

Supplementary Table 22: Parameters of OPC-163493 intervention study in salt-loaded SHRSPs (2nd exp.)

Supplementary Table 23: Sensitization of OPC-163493 to NP-induced relaxation of rat aortas

Supplementary Table 24: Summary of 4-week repeated oral dosing toxicity study in rats

Supplementary Table 25: Summary of 13-week repeated oral dosing toxicity study in rats

Supplementary Table 26: Toxic changes observed with a four-week, repeated oral dosing toxicity study in rats

Supplementary Table 27: Inhibitory effect of OPC-163493 on radioligand binding to various receptors, ion channels and transporters

## **Supplementary Discussions**

Supplementary Discussion 1

Supplementary Discussion 2

## **1 Supplementary References**

2

## Supplementary Figures

**a**

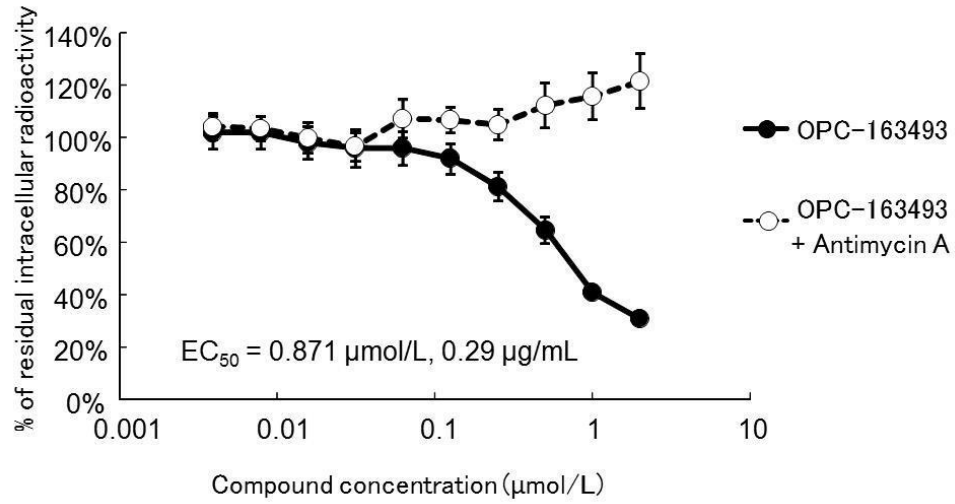

**b**

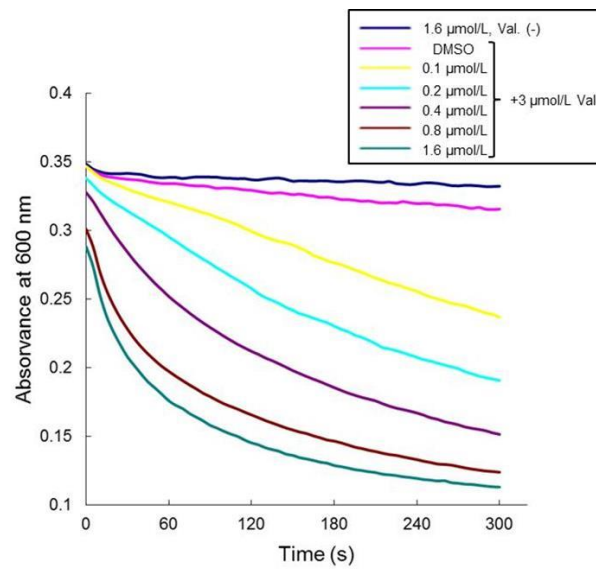

**c**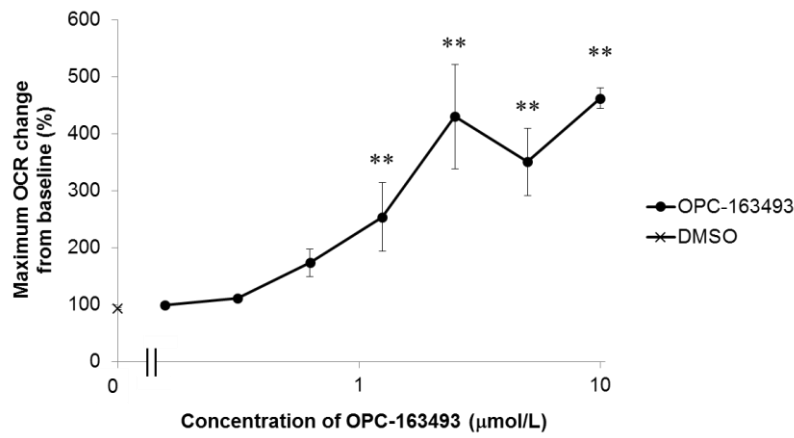**d**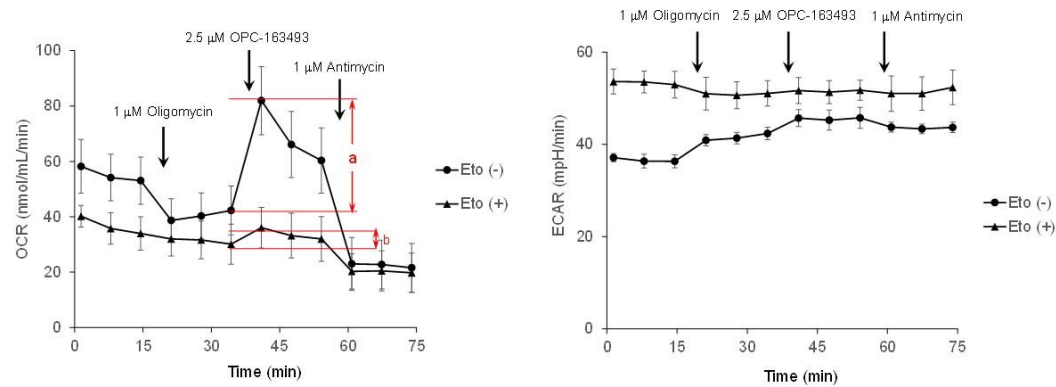

a-b=OCR elevation corresponding to FAO induced by OPC-163493

**Supplementary Figure 1** In vitro activity of OPC-163493 related to mUncoupling and a mitochondrial swelling assay using FCCP. (a) Assay of TCA cycle activation by OPC-163493 in NaCT stably expressed CHO (NaCT-CHO) cells. Data represent mean  $\pm$  SE ( $n = 4$ ).  $EC_{50} = 0.871$  (95% CI: 0.667–1.138)  $\mu\text{M}$ , estimated by Logit regression analysis (compound concentrations were subjected to logarithmic transformation). The activity disappeared on addition of 0.1  $\mu\text{M}$  antimycin A. (b) Mitochondrial swelling assay of isolated mitochondria from the liver of a male SD rat. The indicated concentration of FCCP was added to isolated mitochondrial solution in isotonic acetate buffer with or without valinomycin (Val) at 0 sec and absorbance of the solution was measured at 600 nm. Dark blue line; 1.6  $\mu\text{M}$  without Val, pink line; DMSO control, yellow line; 0.1  $\mu\text{M}$  with Val, blue line; 0.2  $\mu\text{M}$  with Val, purple line; 0.4  $\mu\text{M}$  with Val, brown line; 0.8  $\mu\text{M}$  with Val, green line; 1.6  $\mu\text{M}$  with Val. (c) OCR measurement in rat primary hepatocytes. Data represent mean  $\pm$  SE ( $n = 5$ ). \*\*:  $p < 0.01$ , OPC vs DMSO control using a two-tailed Williams' test. (d) Effect of OPC-163493 on OCR and ECAR in HepG2 cells with glucose-depleted medium. Data represent mean  $\pm$  SE ( $n = 3$ ). Eto: etomoxir.

**a**

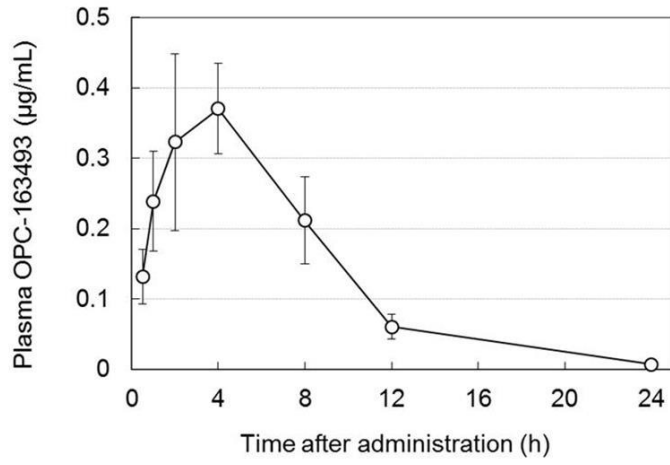

**b**

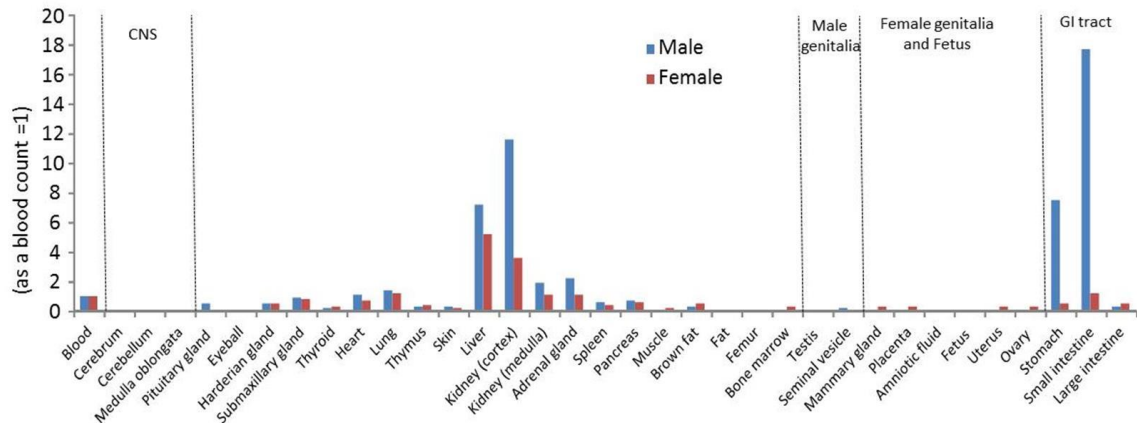

**c**

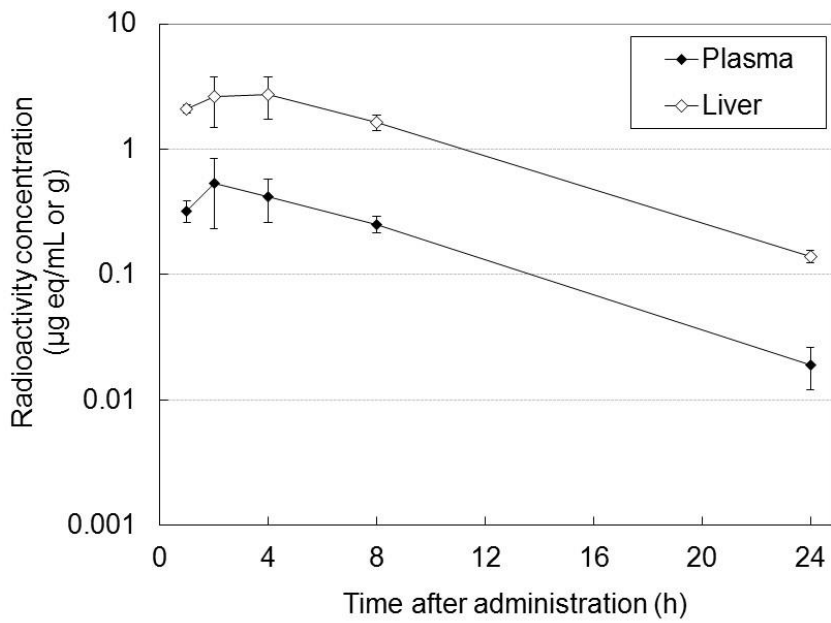

**Supplementary Figure 2** PK and QWBA studies. (a) OPC-163493 plasma concentrations following single oral administration ( $1 \text{ mg kg}^{-1}$ ) to fasted male SD rats, with PK parameters. Data represent mean  $\pm$  SD ( $n = 4$ ). (b) Relative radioactivity in tissues 2 h after single oral administration of [ $^{14}\text{C}$ ]-OPC-163493 suspension at  $1 \text{ mg kg}^{-1}$  to rats using the QWBA method. Relative ratios are shown using blood radioactivity as a reference value of 1.0. (c) Plasma and liver concentration of radioactivity following single oral administration of  $1 \text{ mg kg}^{-1}$  [ $^{14}\text{C}$ ]-OPC-163493 in fasted male rats. Data represent mean  $\pm$  SD ( $n = 3$ ).

a

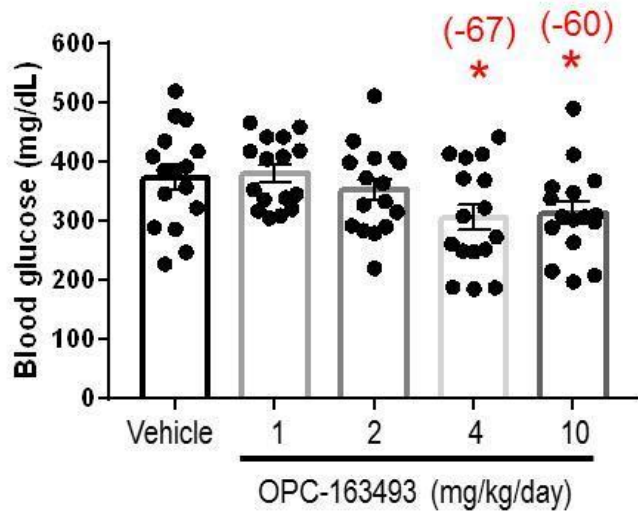

b

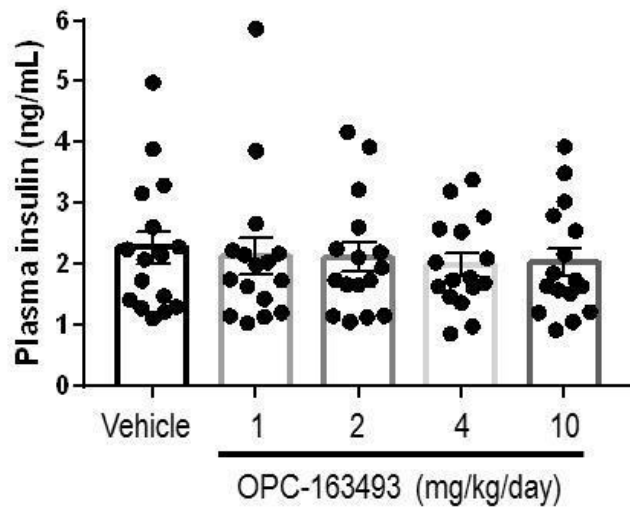

c

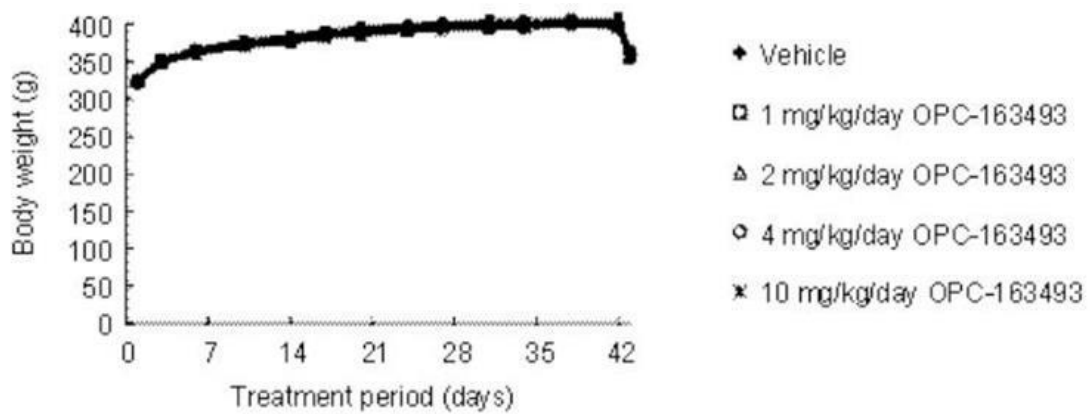



d

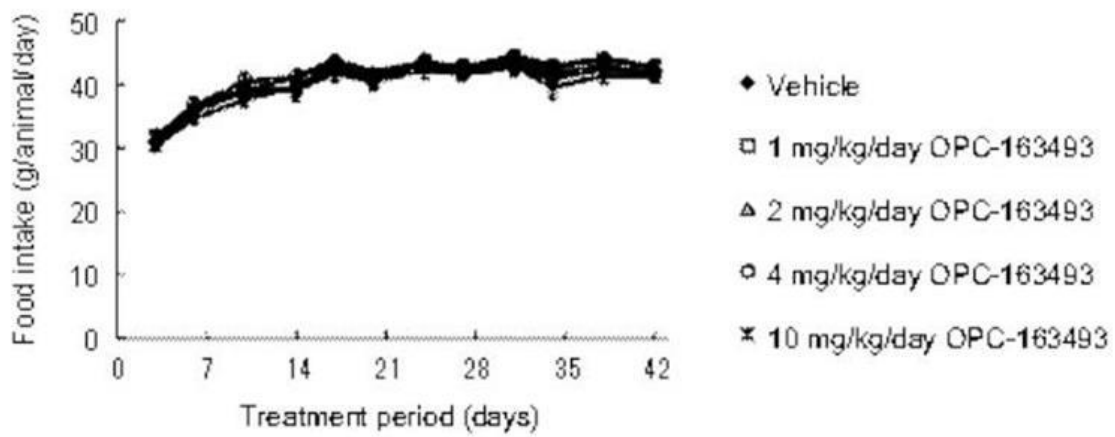

e

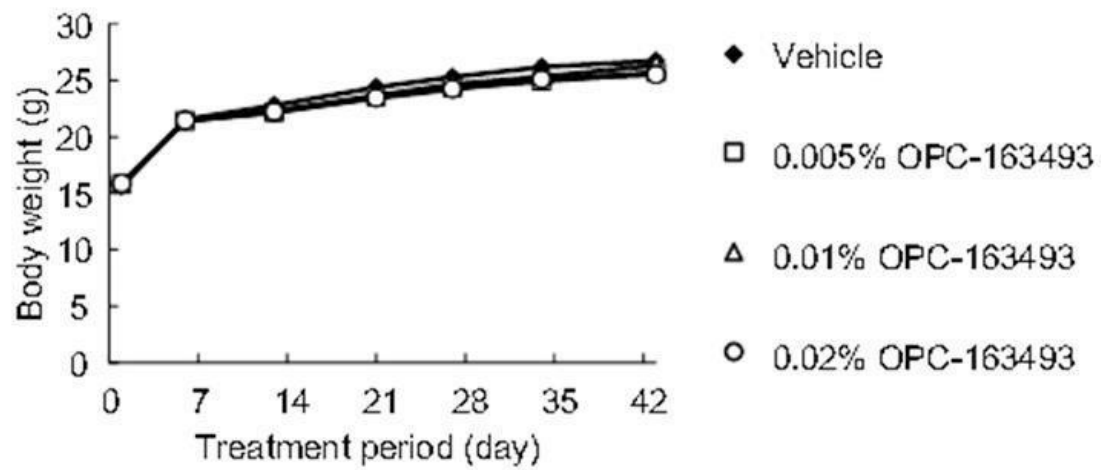

f

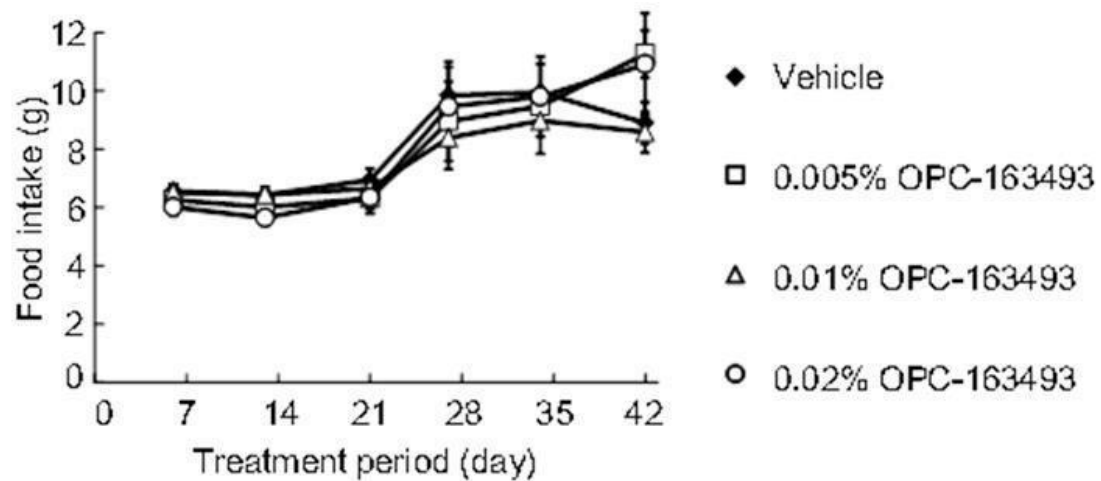

**g**

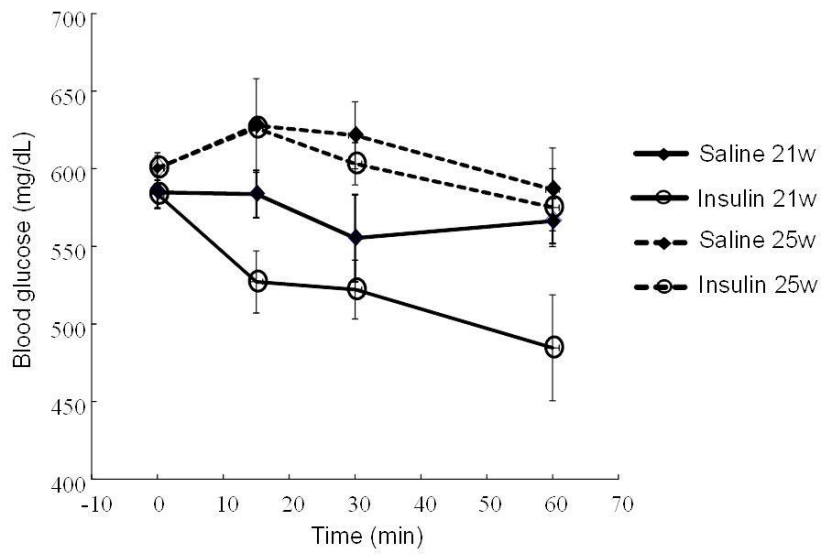

**h**

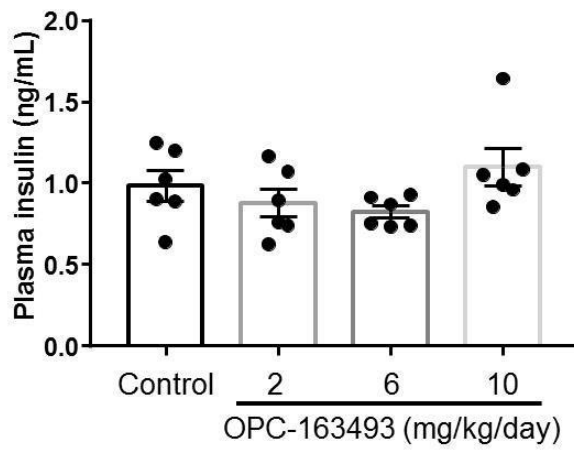

i

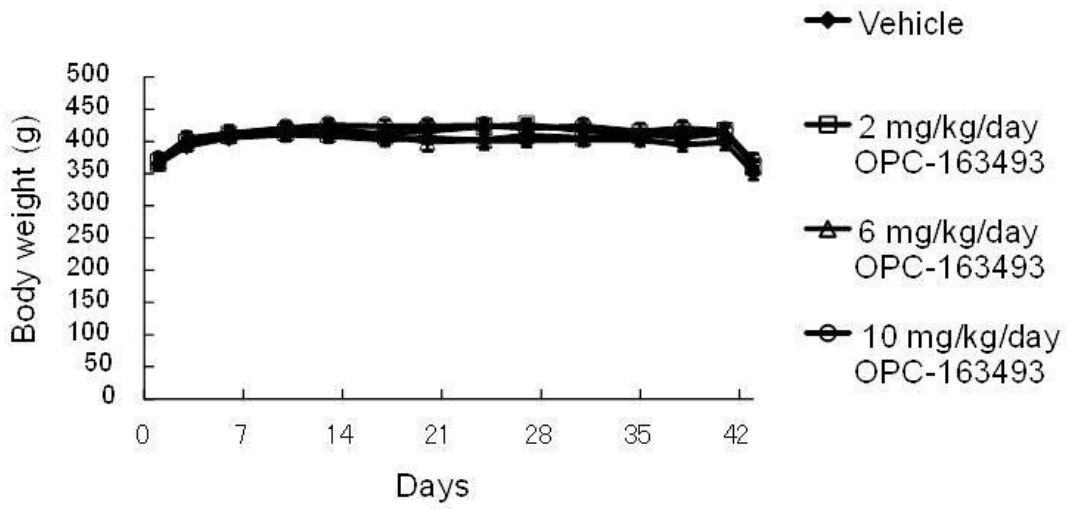

j

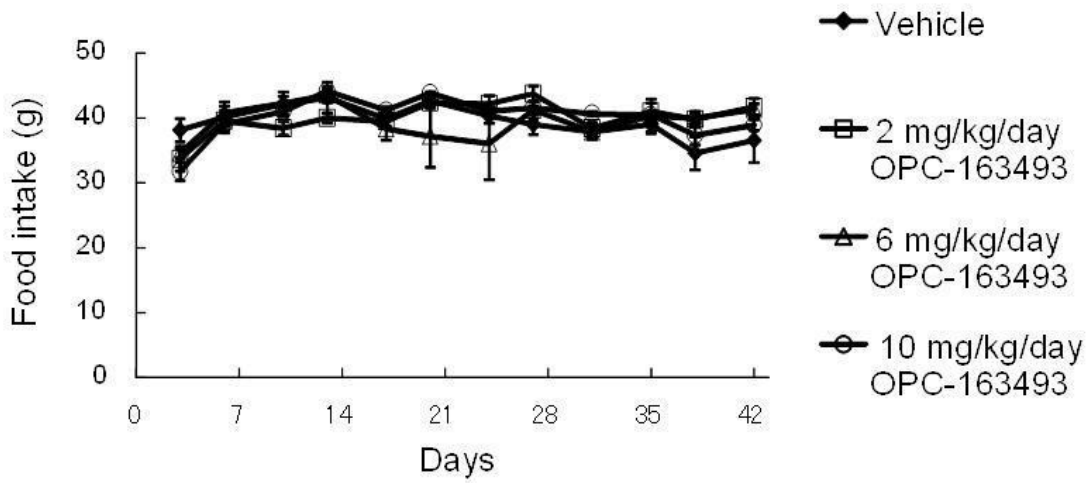

k

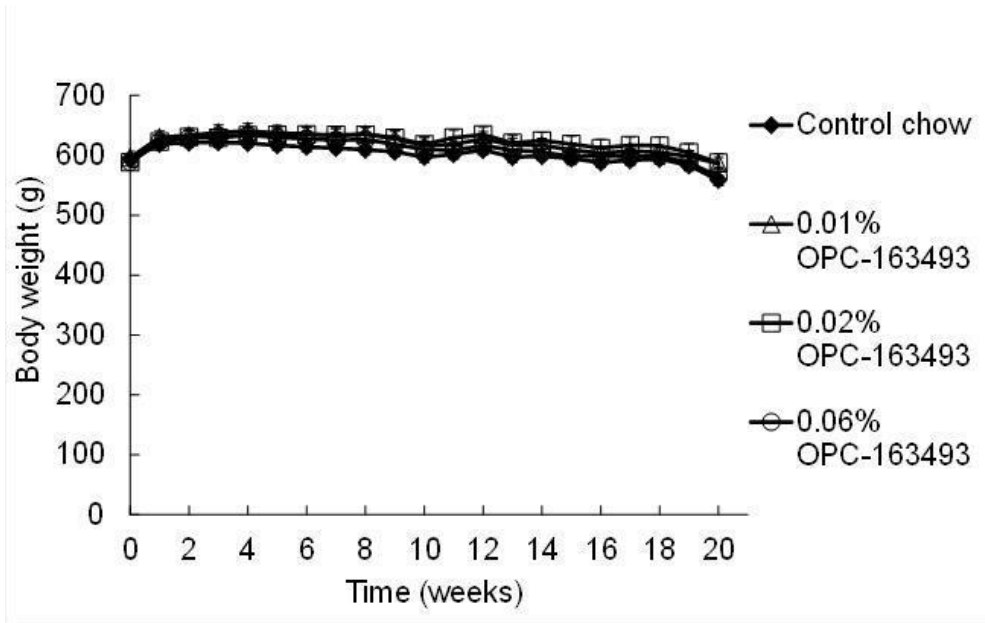

l

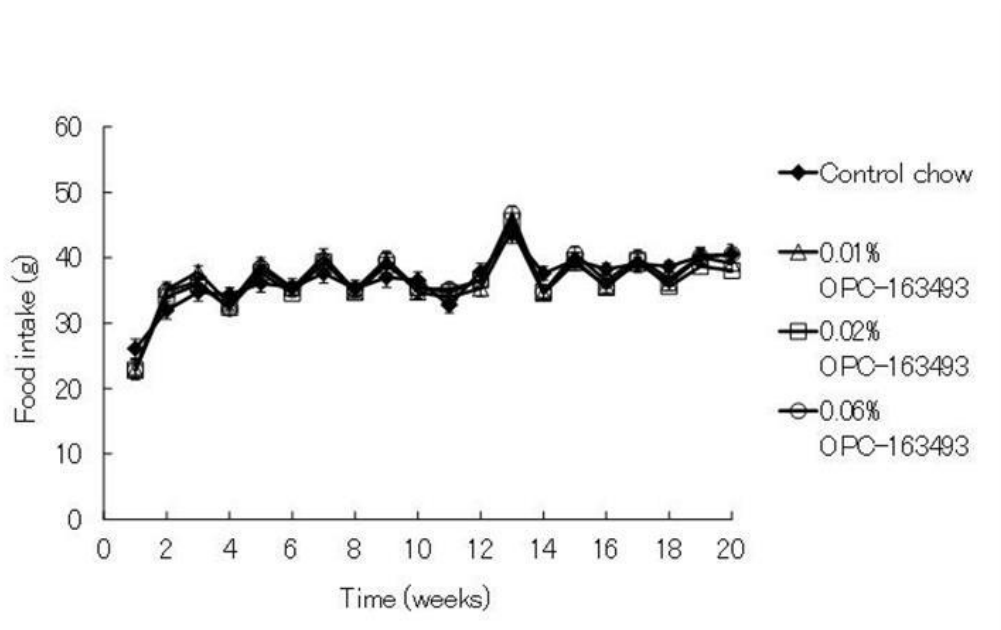

m

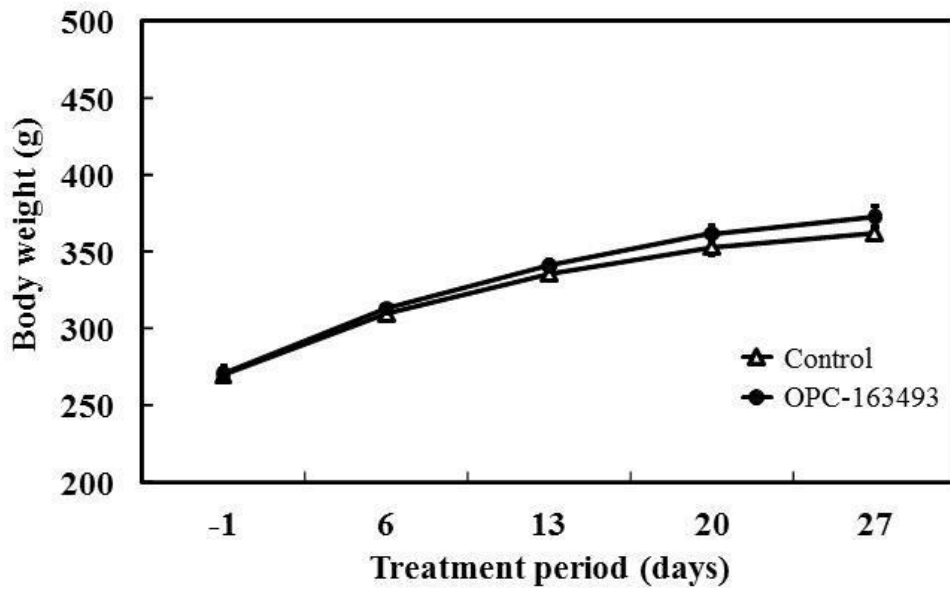

n

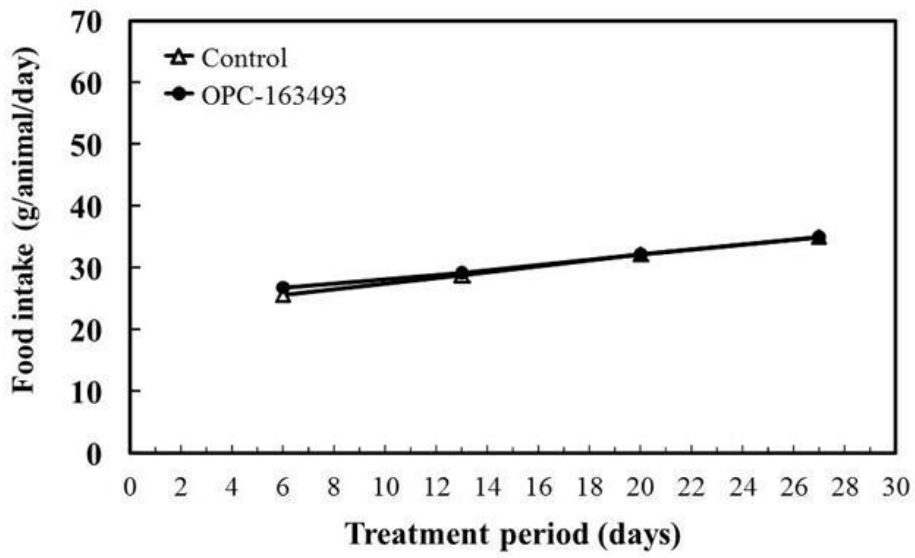

o

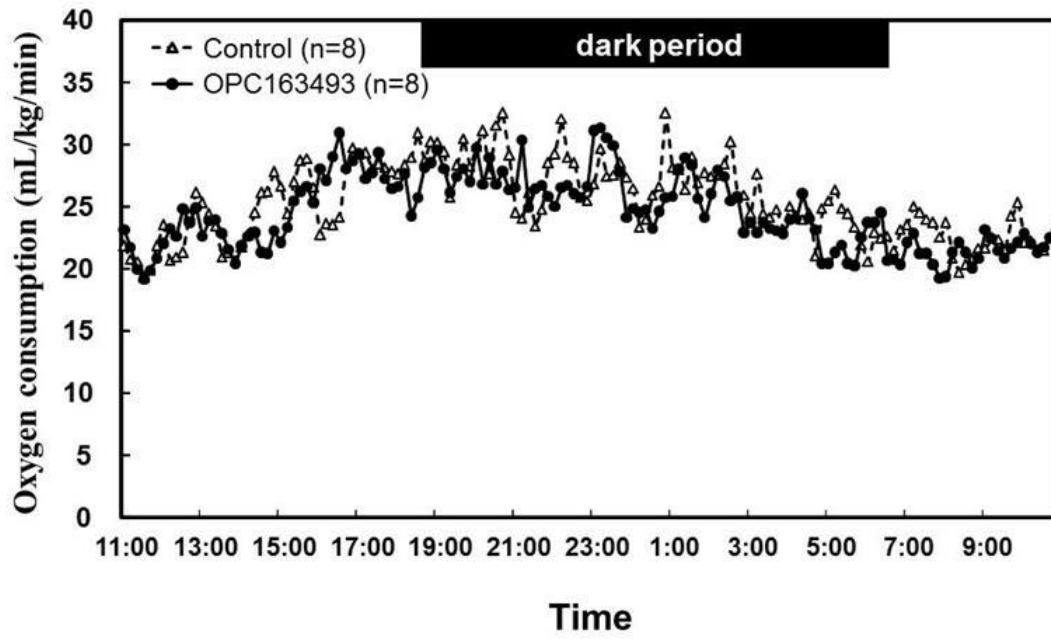

p

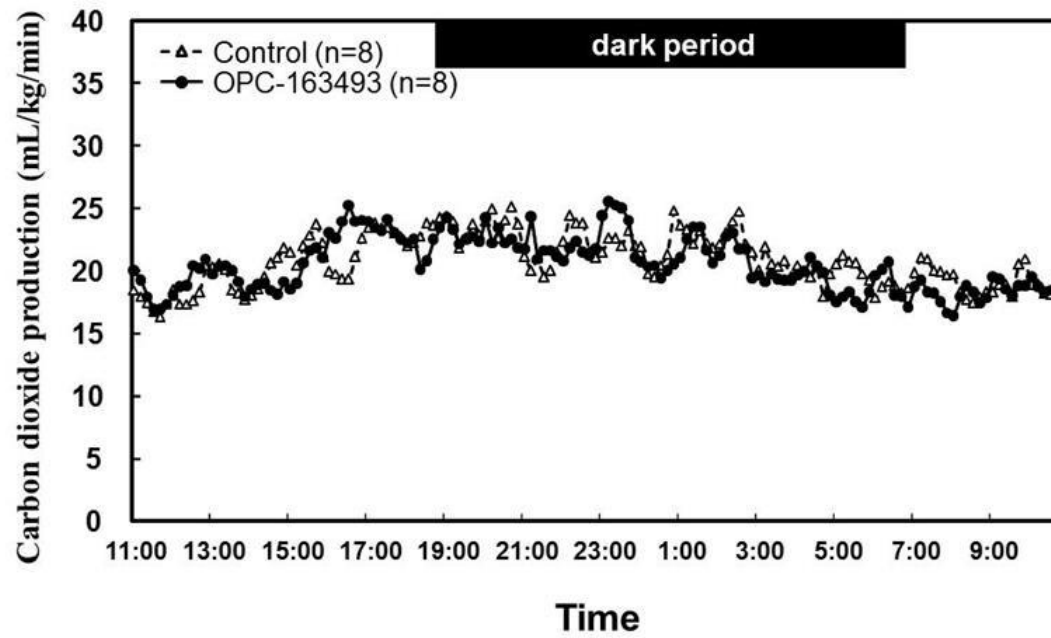

q

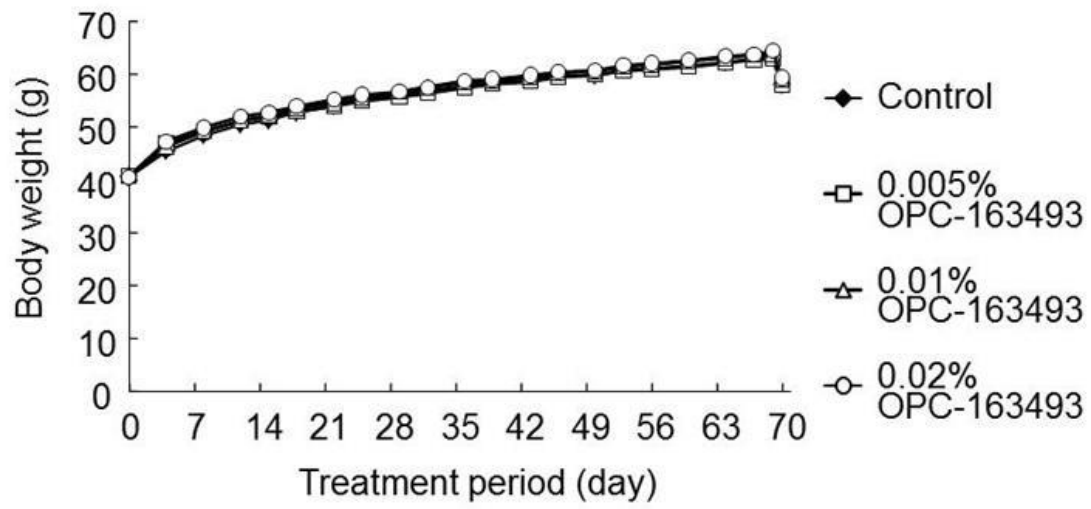

r

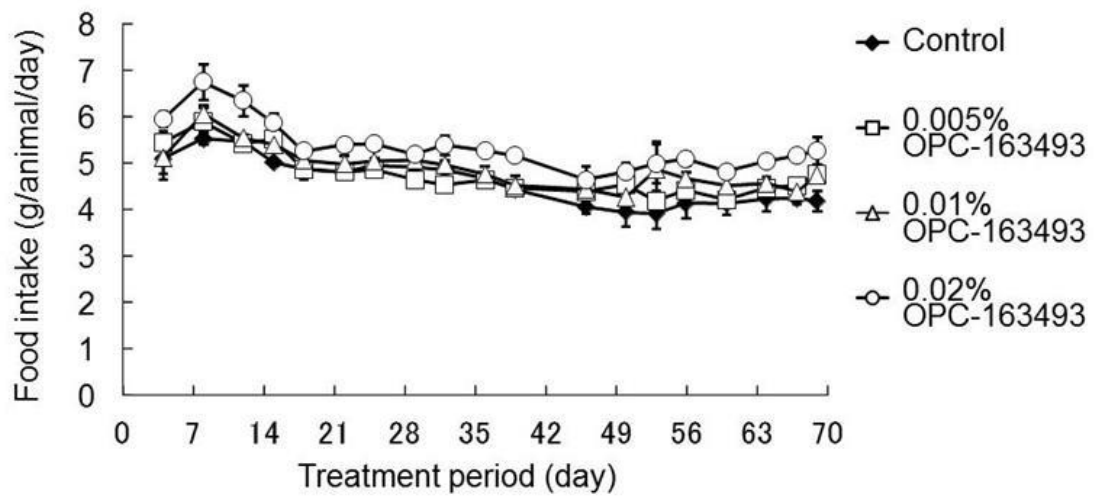

s

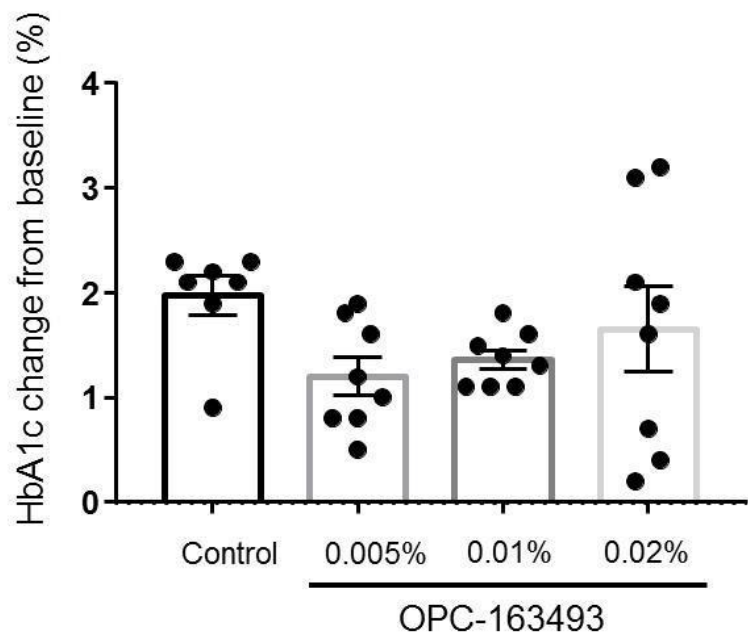

t

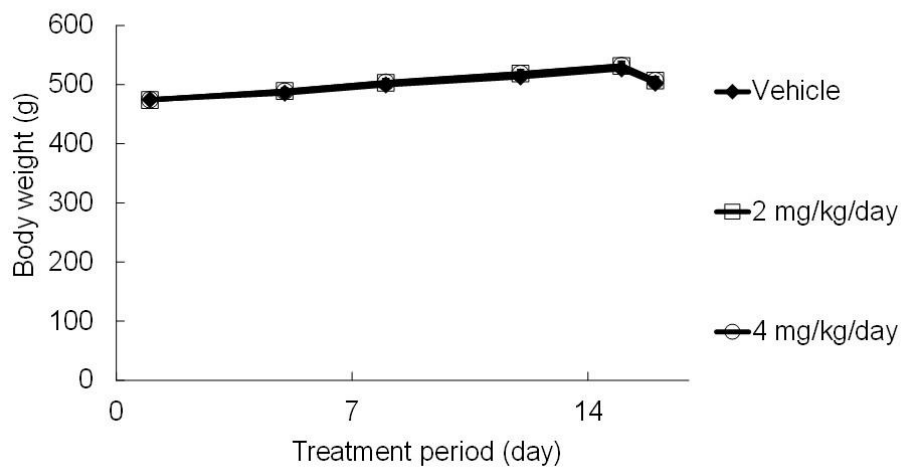



u

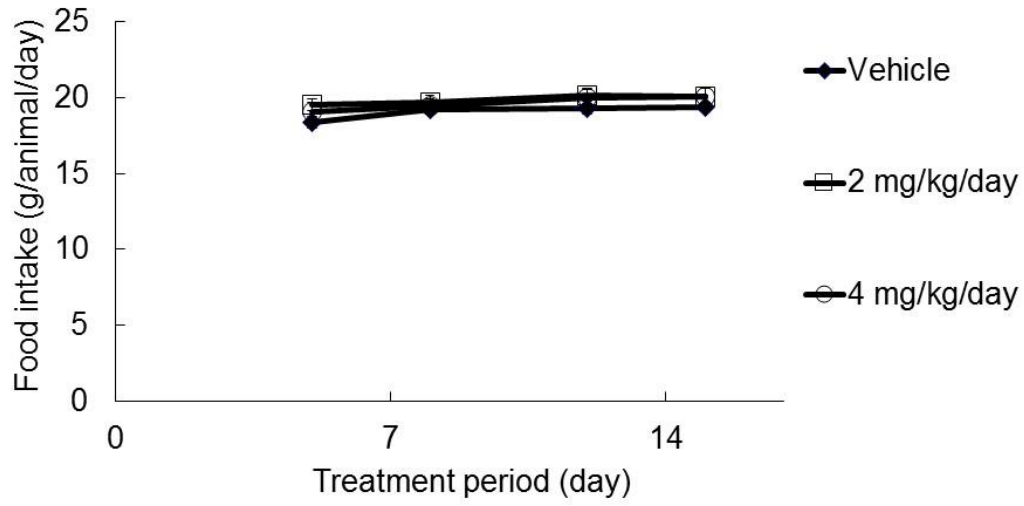

v

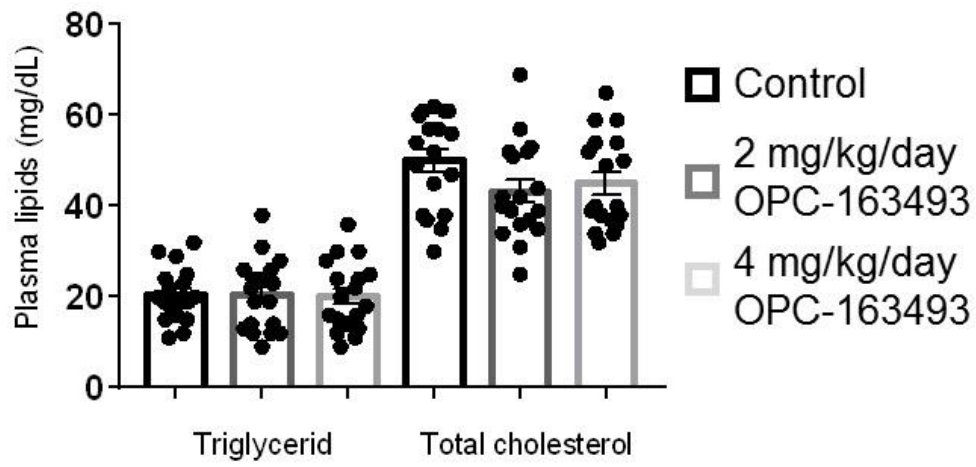

W

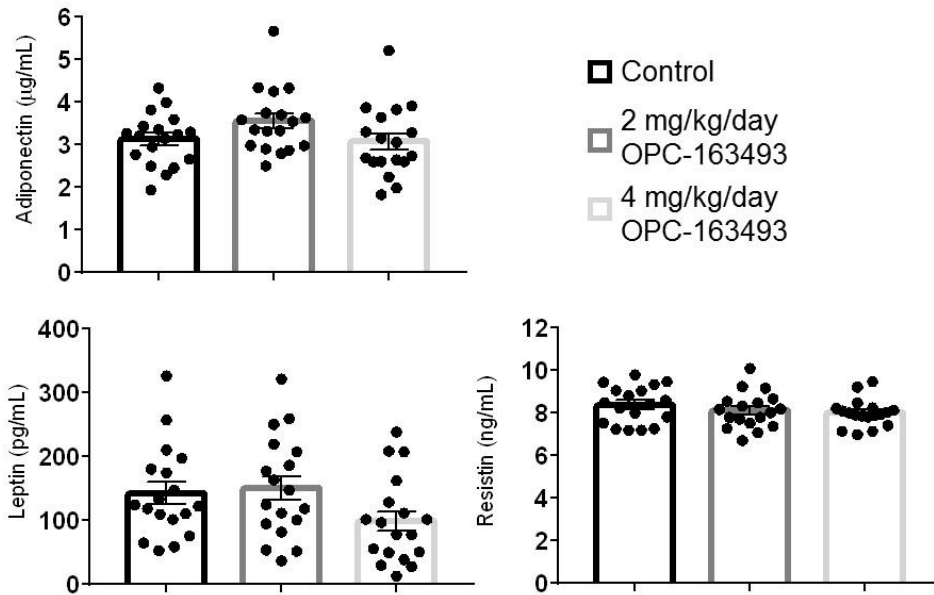

**Supplementary Figure 3** Effects of OPC-163493 in multiple animal models. (a) Effect of OPC-163493 on fasting blood glucose levels in ZDF rats. Data represent mean  $\pm$  SE (n = 16). Significant efficacy was found in the 4 and 10 mg kg<sup>-1</sup> day<sup>-1</sup> OPC-163493-treated groups (\*P < 0.05, OPC vs Vehicle group by Williams' test with two-way ANOVA). (b) Effect of OPC-163493 on fasting insulin level in ZDF rats. Data represent mean  $\pm$  SE (n = 16). No significant difference was found using Williams' test with two-way ANOVA. (c) Effect of OPC-163493 on body weight change in ZDF rats. Data represent mean  $\pm$  SE (n = 16). No significant differences were found using the MMRM method followed by Dunnett's test. Fasting was performed between Days 42 and 43. (d) Effect of OPC-163493 on the change in food intake of ZDF rats. Data represent mean  $\pm$  SE (n = 8). Food intake data are presented as the average values per animal per day. Two animals were accommodated in each cage. No significant differences were found using the MMRM method followed by Dunnett's test. (e) Effect of OPC-163493 on body weight change in Akita mice. Data represent mean  $\pm$  SE (n = 12). No significant differences were found using the MMRM method. (f) Effect of OPC-163493 on food intake change in Akita mice. Data represent mean  $\pm$  SE (n = 6). Two mice were accommodated in each cage. No significant differences were found using the MMRM method. (g) Insulin sensitivity of ZDF rats at the age of 21 and 25 weeks. Insulin tolerance tests were performed using old ZDF rats. One unit kg<sup>-1</sup> insulin or saline were injected intraperitoneally at 0 min. Insulin marginally decreased the blood glucose of 21-week-old ZDF rats (not significant); the response finally disappeared in the rats at 25 weeks. Data represent mean  $\pm$  SE (n = 6). No significant differences were found

in the time-dependent changes in blood glucose levels between saline and insulin-treated groups using the MMRM method. (h) Effect of OPC-163493 on fasting insulin level on Day 43 in old ZDF rats. Data represent mean  $\pm$  SE (n = 6). No significant difference was found using a two-tailed Williams' test. (i) Effect of OPC-163493 on body weight change in old ZDF rats. Data represent mean  $\pm$  SE (n = 6). No significant differences were found using the MMRM method. Fasting was performed between Days 42 and 43. (j) Effect of OPC-163493 on food intake change in old ZDF rats. Data represent mean  $\pm$  SE (n = 3). Two rats were accommodated in each cage. No significant differences were found using the MMRM method. (k) Effect of OPC-163493 on body weight change in OLETF rats. Data represent mean  $\pm$  SE (n = 14). No significant differences were found using the MMRM method. (l) Effect of OPC-163493 on food intake change in OLETF rats. Data represent mean  $\pm$  SE (n = 14). No significant differences were found using the MMRM method. (m) Effect of OPC-163493 on body weight change in ZDF(M) rats. Data represent mean  $\pm$  SE (n = 8). No significant differences were found using the MMRM method. (n) Effect of OPC-163493 on food intake change in ZDF(M) rats. Data represent mean  $\pm$  SE (n = 8). No significant differences were found using the MMRM method. (o) Effect of OPC-163493 on oxygen consumption in ZDF(M) rats after four weeks of treatment. Data represent mean (n = 8). (p) Effect of OPC-163493 on carbon dioxide production in ZDF(M) rats after four weeks of treatment. Data represent mean (n = 8). (q) Effect of OPC-163493 on body weight change in ob/ob mice. Data represent mean  $\pm$  SE (control group: n = 7, other groups: n = 8). No significant difference was found using the MMRM method. Fasting was enforced between Days 69 and 70. (r) Effect of OPC-163493 on food intake change in ob/ob mice. Data represent mean  $\pm$  SE (n = 4). Two mice were accommodated in each cage. A significant difference was found between the control and 0.02% OPC-treatment groups using the MMRM method followed by Dunnett's test ( $P < 0.01$ ). (s) Effect of OPC-163493 on HbA1c changes from baseline in ob/ob mice. Data represent mean  $\pm$  SE (control group: n = 7, other groups: n = 8). No significant differences were found using Dunnett's test. (t) Effect of OPC-163493 on body weight change in HFD SD rats. Data represent mean  $\pm$  SE (n = 18). No significant difference was found using the MMRM method followed by Dunnett's test. Fasting was performed between Day 15 and Day 16. (u) Effect of OPC-163493 on food intake change in HFD SD rats. Data represent mean  $\pm$  SE (n = 9). No significant differences were found using the MMRM method followed by Dunnett's test. (v) Effect of OPC-163493 on plasma lipids in HFD SD rats. Data represent mean  $\pm$  SE (n = 18). No significant differences were found by Dunnett's test. (w) Effect of OPC-163493 on plasma adipokines in HFD SD rats. Data represent mean  $\pm$  SE (n = 18). No significant differences were found by Dunnett's test.

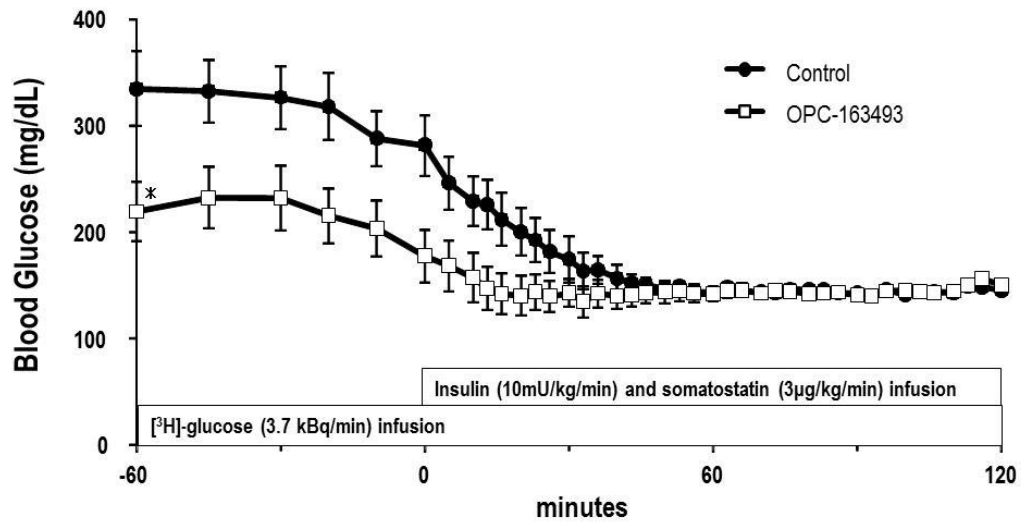

**Supplementary Figure 4** Blood glucose levels during hyperinsulinemic-euglycemic clamp test. Data represent mean  $\pm$  SE (n = 12). A significant difference was found at -60 min (\* P < 0.05 by unpaired t-test).

a

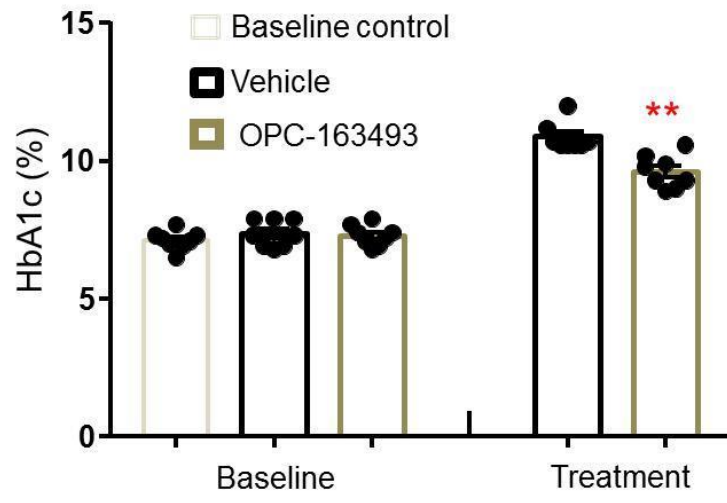

b

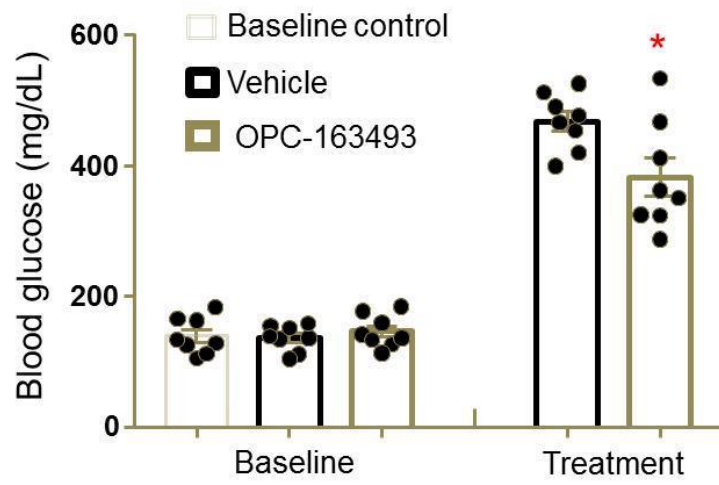

c

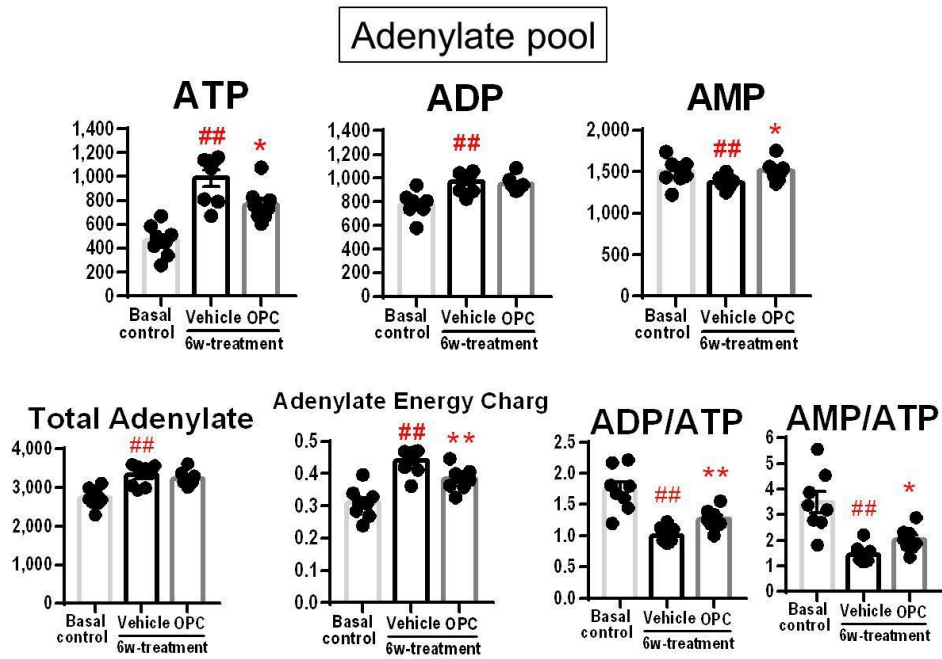

d

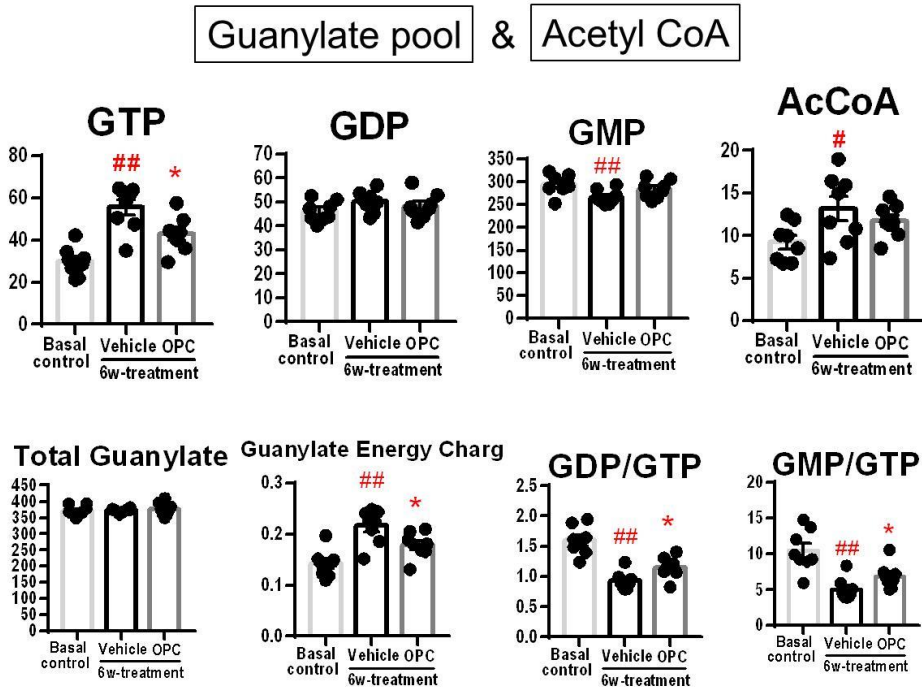

e

NAD(P)/H redox

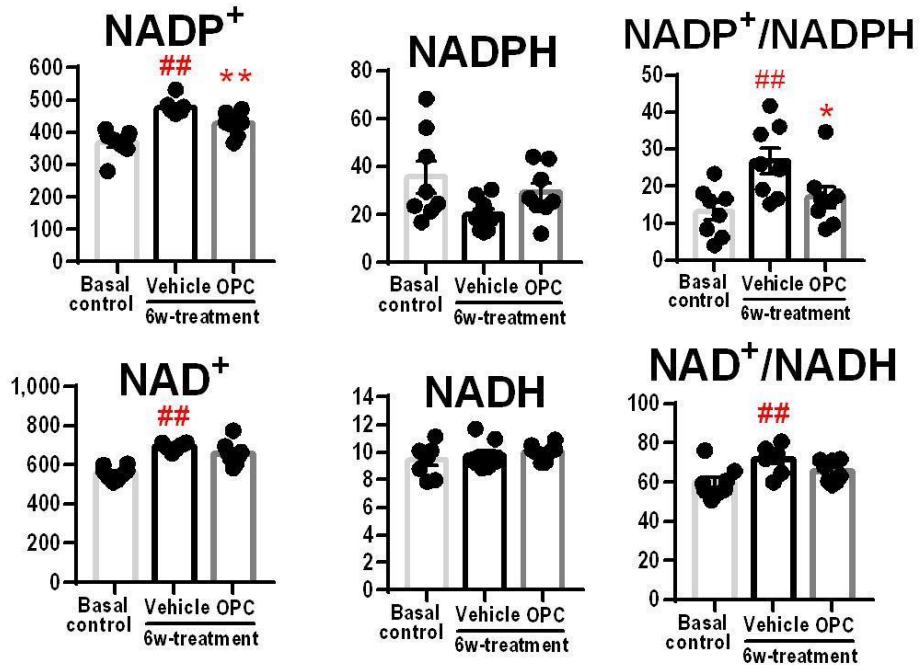

f

Glutathione

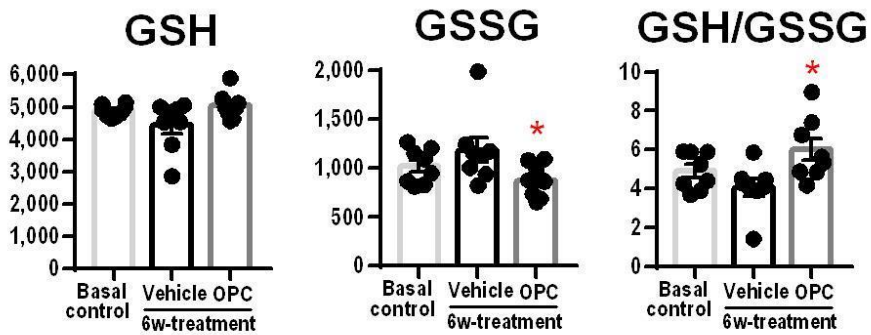

g

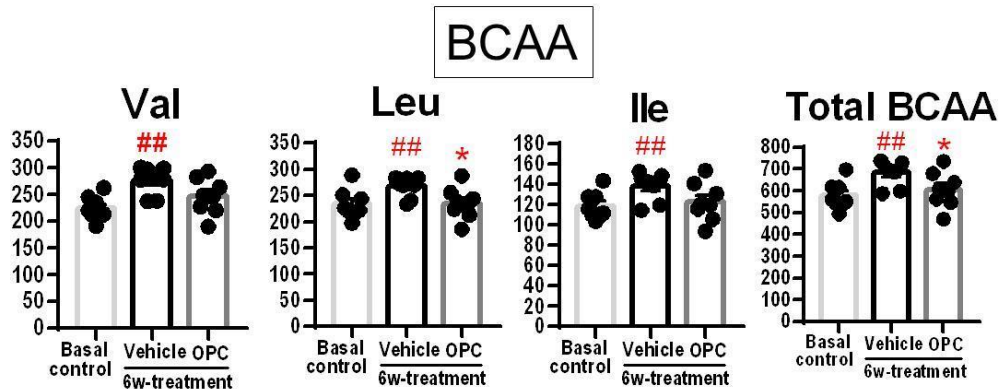

**Supplementary Figure 5** Metabolomic analysis of in vivo effects of OPC-163493 in ZDF rats. (a) Effect of OPC-163493 on HbA1c value in ZDF rats. Significant efficacy was found in the OPC-163493-treated group (\*\*P < 0.01, OPC vs Vehicle group by unpaired t-test). (b) Effect of OPC-163493 on fasting blood glucose level in ZDF rats. Significant efficacy was found in the OPC-163493-treated group (\*P < 0.05, OPC vs Vehicle group by unpaired t-test). (c) Effects on adenylate pool. (d) Effects on guanylate pool and Acetyl CoA. (e) Effects on NAD(P)H redox. (f) Effects on glutathione redox. (g) Effects of BCAA metabolism. \*P < 0.05, \*\*P < 0.01, Vehicle group vs OPC-treatment group by unpaired t-test; #P < 0.05, ##P < 0.01, Baseline control group vs Vehicle group by unpaired t-test. All units of vertical lines in metabolite graphs are nmol g<sup>-1</sup> of tissue (except ratios of substrates). Abbreviations and meanings of metabolic parameters are as in Supplementary Table 20.



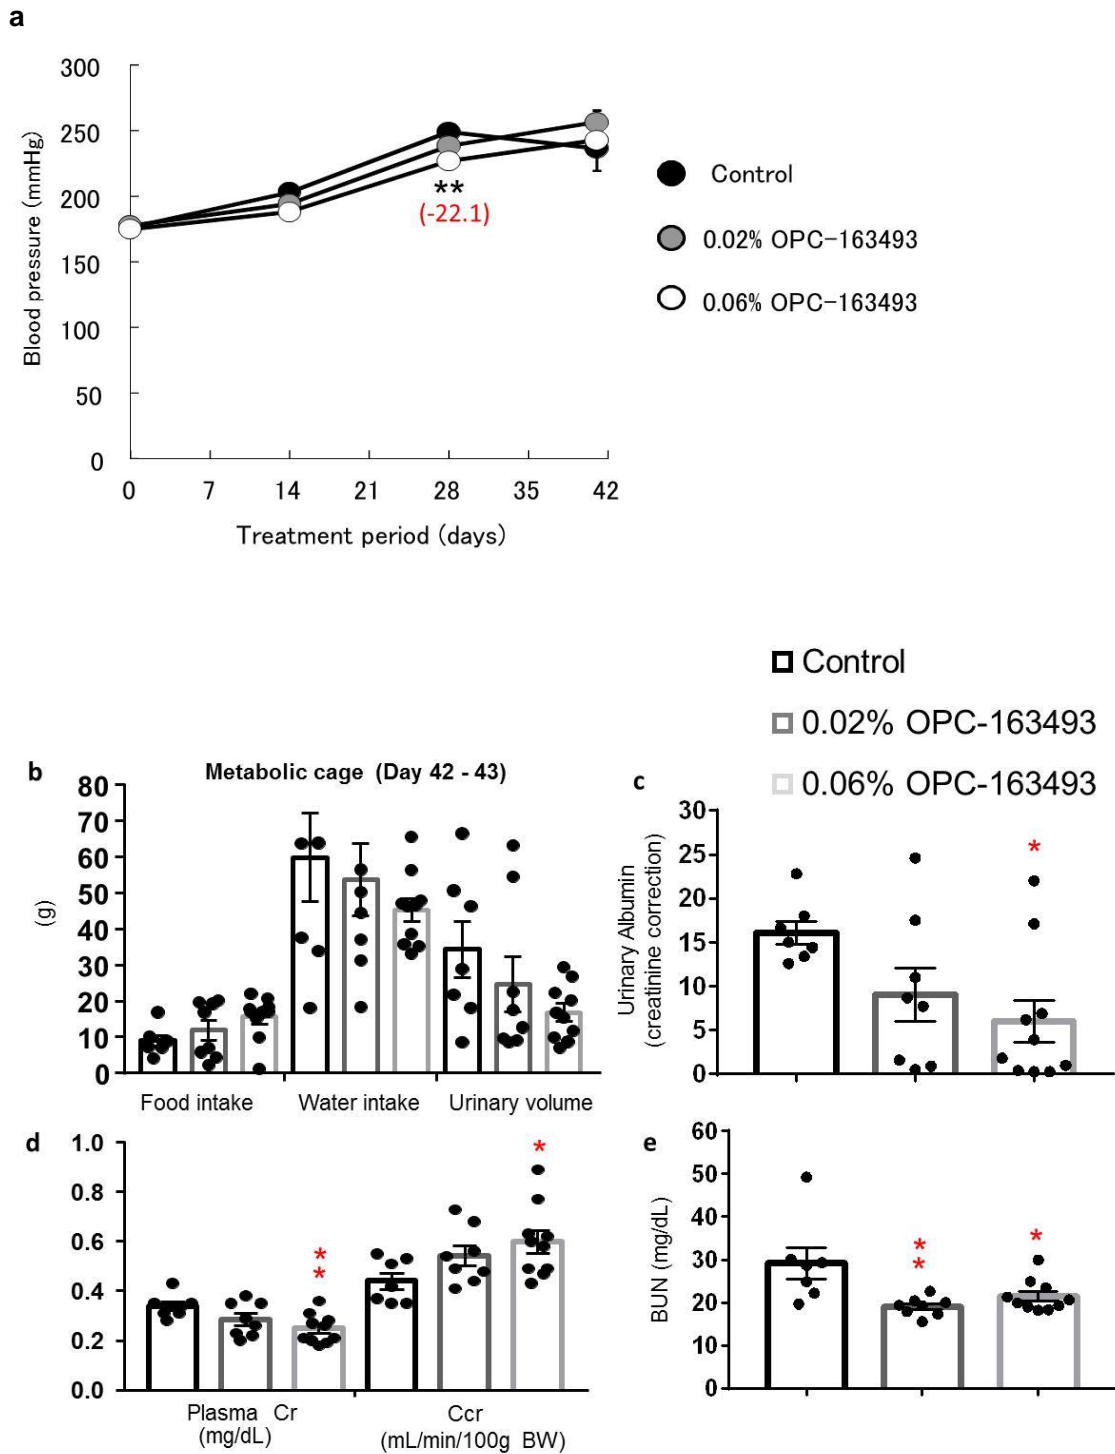

**Supplementary Figure 6** Beneficial effects of OPC-163493 in salt-loaded SHRSPs. (a) Blood pressure-lowering effect. Systolic blood pressures (SBPs) are shown. Data represent mean  $\pm$  SE (n = 10). As significant decreases were found in the overall treatment differences in SBP by the MMRM method (0.06% OPC vs Control chow group,  $P < 0.01$ ), treatment-by-time interaction was then estimated by contrast-averaging the corresponding

treatment differences at each time point using the MMRM method (\*\*P < 0.01). Since animal deaths were already seen in the control group and 0.02% mixed chow group by Day 41 (Supplementary Table 22), data on Day 41 were not included in the statistical analysis. (b) food intake, water drinking, urinary volume obtained from metabolic cages, (c) urinary albumin, (d) plasma creatinine (Cr) and Cr clearance (Ccr) (e) blood urea nitrogen (BUN) Data represent mean  $\pm$  SE (Control: n = 7, 0.02% OPC: n = 8, 0.06% OPC: n = 10, \* P < 0.05, \*\* P < 0.01 by Dunnett's test).

**a**

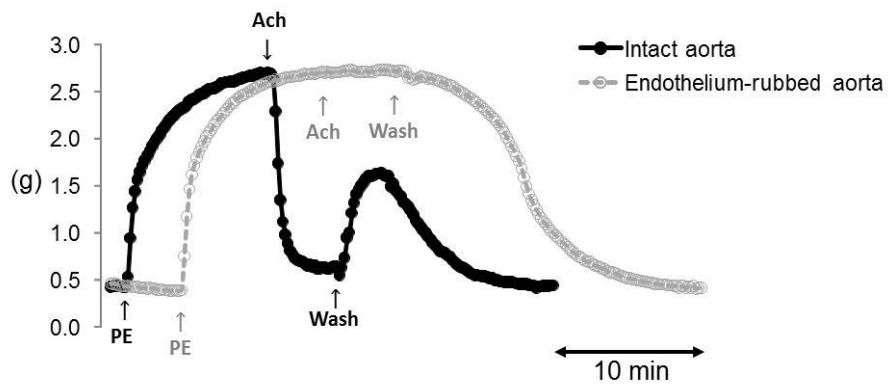

**b**

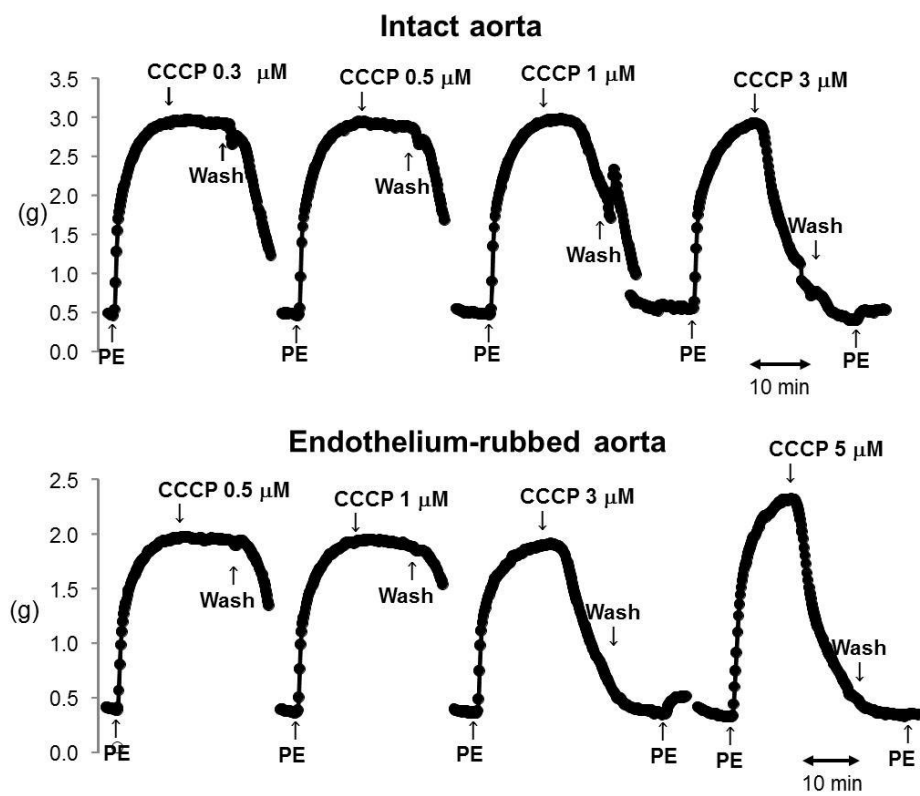

c

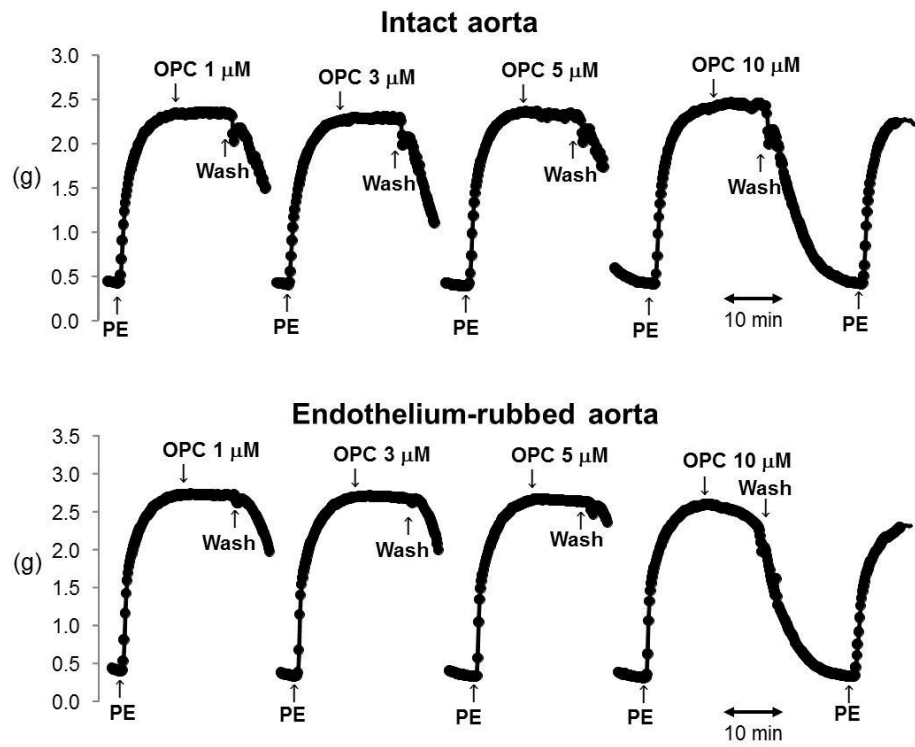

d

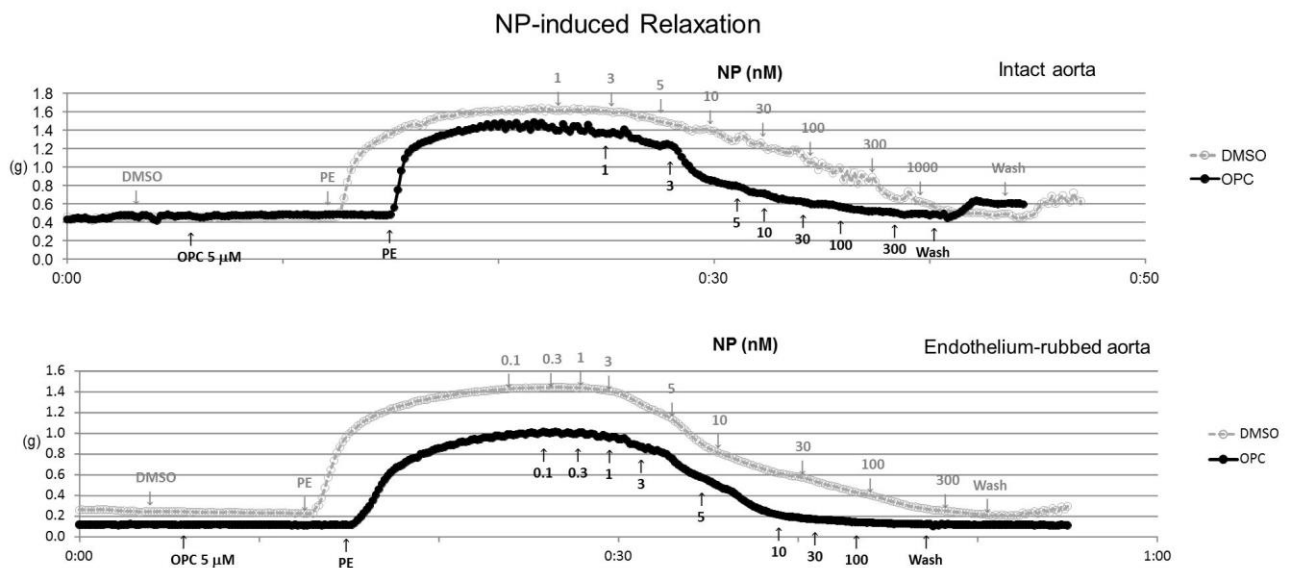

**Supplementary Figure 7** Isometric tension recordings obtained from rat thoracic aortas.

(a) Responses of intact and endothelium-rubbed aortas to PE (1 μM) and Ach (10 μM). The tension values were recorded at 1-sec intervals, and every 10 sec the average was calculated for graph-plotting. Representative graph is shown. (b) CCCP-induced relaxation

of rat aortas constricted by PE. Because the response gradually continued for a substantial duration, measurement was stopped at 10 min after CCCP addition. Representative graph is shown. (c) Effect of OPC-163493 on rat aortas constricted by PE. Representative graph is shown. (d) Sensitization of OPC-163493 to NP-induced relaxation of rat aortas. Representative graph is shown.

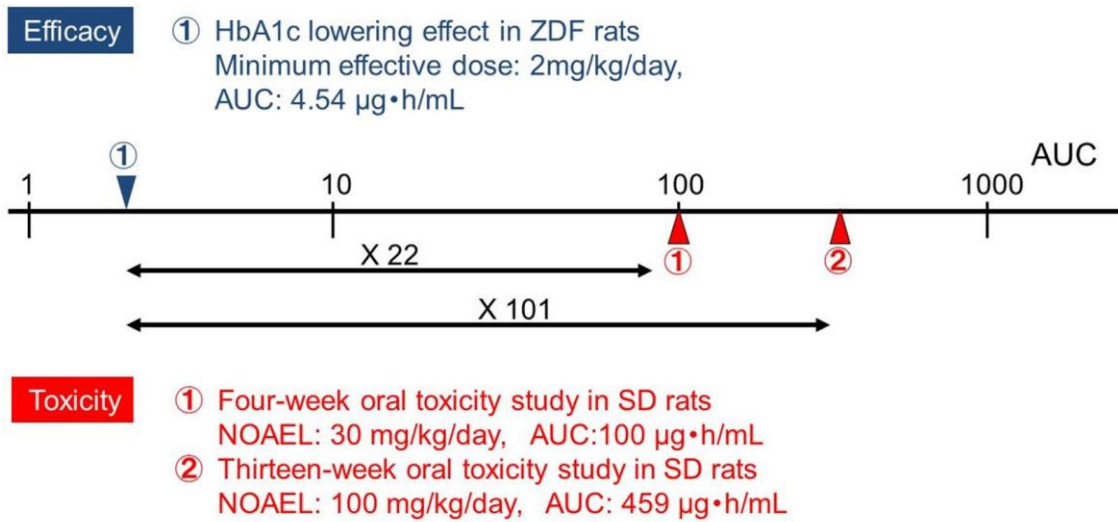

**Supplementary Figure 8** Efficacy and toxicity of OPC-163493 in rats. Minimum effective dose was demonstrated in the efficacy study in ZDF rats (Fig. 2a and Supplementary Table 5).

**a**

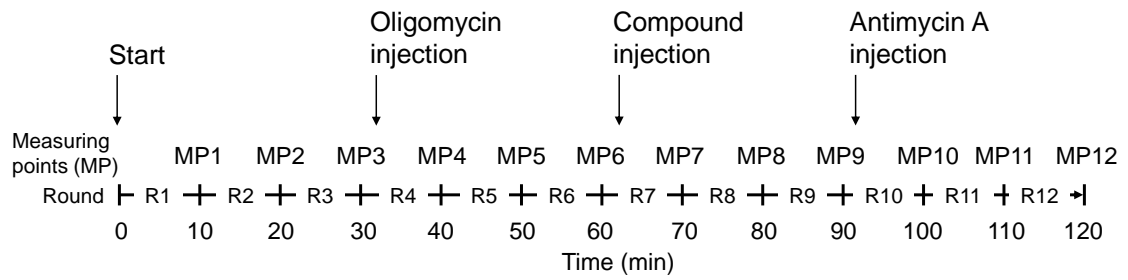

**b**

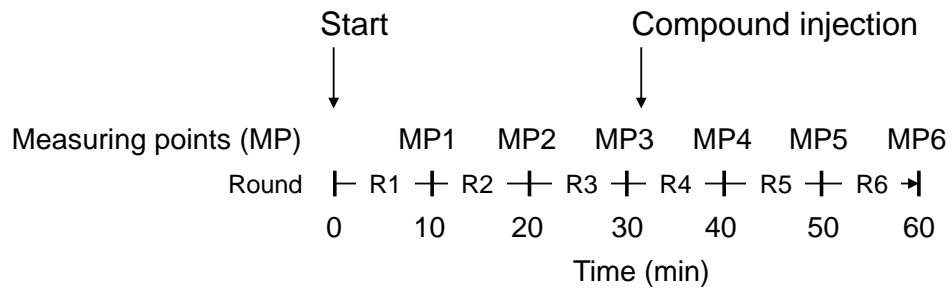

**Supplementary Figure 9** Schemes of compound injections and OCR, CDER and ECAR measuring points. (a) Quantification of mUncoupling activity. (b) Measurements of cellular fluxes.

## Supplementary Tables

Supplementary Table 1 Radioactivity in tissues after single oral administration of [<sup>14</sup>C]-OPC-163493 suspension at 1 mg/kg to male rats by QWBA method

| Tissue             | Radioactivity Concentration (ng eq/g) (Tissue/Blood Ratio) |               |                |              |            |
|--------------------|------------------------------------------------------------|---------------|----------------|--------------|------------|
|                    | 2 h                                                        | 8 h           | 12 h           | 24 h         | 72 h       |
| Blood              | 127.5 ( 1.0 )                                              | 114.5 ( 1.0 ) | 43.99 ( 1.0 )  | NC ( NC )    | NC ( NC )  |
| Cerebrum           | BLQ ( 0.0 )                                                | BLQ ( NC )    | BLQ ( NC )     | BLQ ( NC )   | NC ( NC )  |
| Cerebellum         | BLQ ( 0.0 )                                                | BLQ ( NC )    | BLQ ( NC )     | NC ( NC )    | NC ( NC )  |
| Medulla oblongata  | BLQ ( 0.0 )                                                | BLQ ( NC )    | BLQ ( NC )     | NC ( NC )    | NC ( NC )  |
| Pituitary gland    | 60.50 ( 0.5 )                                              | 36.73 ( 0.3 ) | 30.29 ( 0.7 )  | NC ( NC )    | NC ( NC )  |
| Eyeball            | BLQ ( 0.0 )                                                | BLQ ( NC )    | BLQ ( NC )     | NC ( NC )    | NC ( NC )  |
| Harderian gland    | 58.40 ( 0.5 )                                              | 45.96 ( 0.4 ) | 30.75 ( 0.7 )  | NC ( NC )    | NC ( NC )  |
| Submaxillary gland | 109.4 ( 0.9 )                                              | 91.37 ( 0.8 ) | 48.18 ( 1.1 )  | NC ( NC )    | NC ( NC )  |
| Thyroid            | 30.13 ( 0.2 )                                              | 28.38 ( 0.2 ) | 49.83 ( 1.1 )  | NC ( NC )    | NC ( NC )  |
| Heart              | 137.5 ( 1.1 )                                              | 112.9 ( 1.0 ) | 44.32 ( 1.0 )  | NC ( NC )    | NC ( NC )  |
| Lung               | 179.2 ( 1.4 )                                              | 168.7 ( 1.5 ) | 46.42 ( 1.1 )  | NC ( NC )    | NC ( NC )  |
| Thymus             | 36.96 ( 0.3 )                                              | 48.59 ( 0.4 ) | 25.88 ( 0.6 )  | NC ( NC )    | NC ( NC )  |
| Skin               | 41.05 ( 0.3 )                                              | 48.89 ( 0.4 ) | BLQ ( NC )     | 70.40 ( NC ) | BLQ ( NC ) |
| Liver              | 916.1 ( 7.2 )                                              | 806.0 ( 7.0 ) | 762.7 ( 17.3 ) | 175.6 ( NC ) | NC ( NC )  |
| Kidney (cortex)    | 1483 ( 11.6 )                                              | 840.3 ( 7.3 ) | 690.3 ( 15.7 ) | 198.1 ( NC ) | NC ( NC )  |
| Kidney (medulla)   | 245.7 ( 1.9 )                                              | 1588 ( 13.9 ) | 122.3 ( 2.8 )  | 21.99 ( NC ) | NC ( NC )  |
| Adrenal gland      | 285.5 ( 2.2 )                                              | 125.2 ( 1.1 ) | 52.38 ( 1.2 )  | BLQ ( NC )   | NC ( NC )  |
| Spleen             | 70.56 ( 0.6 )                                              | 48.63 ( 0.4 ) | 23.79 ( 0.5 )  | BLQ ( NC )   | NC ( NC )  |
| Pancreas           | 92.51 ( 0.7 )                                              | 95.37 ( 0.8 ) | 42.80 ( 1.0 )  | BLQ ( NC )   | NC ( NC )  |
| Muscle             | NC ( 0.0 )                                                 | 36.45 ( 0.3 ) | BLQ ( NC )     | NC ( NC )    | NC ( NC )  |
| Brown fat          | 38.89 ( 0.3 )                                              | 20.89 ( 0.2 ) | BLQ ( NC )     | NC ( NC )    | NC ( NC )  |
| Fat                | BLQ ( 0.0 )                                                | BLQ ( NC )    | BLQ ( NC )     | BLQ ( NC )   | NC ( NC )  |
| Femur              | NC ( 0.0 )                                                 | BLQ ( NC )    | NC ( NC )      | NC ( NC )    | NC ( NC )  |
| Bone marrow        | NC ( 0.0 )                                                 | 54.36 ( 0.5 ) | 21.12 ( 0.5 )  | NC ( NC )    | NC ( NC )  |
| Testis             | BLQ ( 0.0 )                                                | BLQ ( NC )    | BLQ ( NC )     | NC ( NC )    | NC ( NC )  |
| Seminal vesicle    | 25.72 ( 0.2 )                                              | BLQ ( NC )    | BLQ ( NC )     | NC ( NC )    | NC ( NC )  |
| Stomach            | 960.3 ( 7.5 )                                              | 776.7 ( 6.8 ) | 954.6 ( 21.7 ) | BLQ ( NC )   | NC ( NC )  |
| Small intestine    | 2254 ( 17.7 )                                              | 1954 ( 17.1 ) | 1285 ( 29.2 )  | 778.4 ( NC ) | NC ( NC )  |
| Large intestine    | 34.03 ( 0.3 )                                              | 23.57 ( 0.2 ) | 487.8 ( 11.1 ) | 3066 ( NC )  | NC ( NC )  |

BLQ: Below lower limit of quantification (20 ng eq g<sup>-1</sup>). NC: not evaluated because of the low radioactivity in the case of radioactivity concentration and not calculated in the case of tissue/blood ratio. A linear calibration curve was obtained in the range of 20–20,000 ng eq mL<sup>-1</sup>.



Supplementary Table 2 Radioactivity in tissues after single oral administration of [<sup>14</sup>C]-OPC-163493 suspension at 1 mg/kg to Day 17 pregnancy rats by QWBA method

| Tissue             | Radioactivity Concentration (ng eq/g) (Tissue/Blood Ratio) |               |                |              |           |
|--------------------|------------------------------------------------------------|---------------|----------------|--------------|-----------|
|                    | 2 h                                                        | 8 h           | 12 h           | 24 h         | 72 h      |
| Blood              | 306.0 ( 1.0 )                                              | 366.2 ( 1.0 ) | 64.08 ( 1.0 )  | NC ( NC )    | NC ( NC ) |
| Cerebrum           | BLQ ( NC )                                                 | BLQ ( NC )    | BLQ ( NC )     | NC ( NC )    | NC ( NC ) |
| Cerebellum         | BLQ ( NC )                                                 | BLQ ( NC )    | BLQ ( NC )     | NC ( NC )    | NC ( NC ) |
| Medulla oblongata  | BLQ ( NC )                                                 | BLQ ( NC )    | NC ( NC )      | NC ( NC )    | NC ( NC ) |
| Pituitary gland    | BLQ ( NC )                                                 | 219.8 ( 0.6 ) | NC ( NC )      | NC ( NC )    | NC ( NC ) |
| Eyeball            | BLQ ( NC )                                                 | BLQ ( NC )    | BLQ ( NC )     | NC ( NC )    | NC ( NC ) |
| Harderian gland    | 163.6 ( 0.5 )                                              | 209.0 ( 0.6 ) | 30.46 ( 0.5 )  | NC ( NC )    | NC ( NC ) |
| Submaxillary gland | 243.2 ( 0.8 )                                              | 307.6 ( 0.8 ) | 61.08 ( 1.0 )  | NC ( NC )    | NC ( NC ) |
| Thyroid            | 94.28 ( 0.3 )                                              | 172.5 ( 0.5 ) | NC ( NC )      | NC ( NC )    | NC ( NC ) |
| Heart              | 228.3 ( 0.7 )                                              | 369.5 ( 1.0 ) | 65.56 ( 1.0 )  | NC ( NC )    | NC ( NC ) |
| Lung               | 368.5 ( 1.2 )                                              | 409.3 ( 1.1 ) | 108.8 ( 1.7 )  | NC ( NC )    | NC ( NC ) |
| Thymus             | 116.3 ( 0.4 )                                              | 187.4 ( 0.5 ) | 40.07 ( 0.6 )  | NC ( NC )    | NC ( NC ) |
| Skin               | 53.55 ( 0.2 )                                              | 147.1 ( 0.4 ) | 27.58 ( 0.4 )  | BLQ ( NC )   | NC ( NC ) |
| Liver              | 1590 ( 5.2 )                                               | 1816 ( 5.0 )  | 811.5 ( 12.7 ) | 233.8 ( NC ) | NC ( NC ) |
| Kidney (cortex)    | 1114 ( 3.6 )                                               | 1409 ( 3.8 )  | 467.6 ( 7.3 )  | 64.04 ( NC ) | NC ( NC ) |
| Kidney (medulla)   | 340.7 ( 1.1 )                                              | 3387 ( 9.2 )  | 154.6 ( 2.4 )  | 312.1 ( NC ) | NC ( NC ) |
| Adrenal gland      | 350.1 ( 1.1 )                                              | 379.2 ( 1.0 ) | 86.31 ( 1.3 )  | NC ( NC )    | NC ( NC ) |
| Spleen             | 137.0 ( 0.4 )                                              | 224.6 ( 0.6 ) | 45.85 ( 0.7 )  | NC ( NC )    | NC ( NC ) |
| Pancreas           | 186.3 ( 0.6 )                                              | 378.1 ( 1.0 ) | 25.22 ( 0.4 )  | NC ( NC )    | NC ( NC ) |
| Muscle             | 63.48 ( 0.2 )                                              | 96.12 ( 0.3 ) | 22.03 ( 0.3 )  | NC ( NC )    | NC ( NC ) |
| Brown fat          | 160.1 ( 0.5 )                                              | 113.3 ( 0.3 ) | NC ( NC )      | NC ( NC )    | NC ( NC ) |
| Fat                | BLQ ( NC )                                                 | 23.37 ( 0.1 ) | BLQ ( NC )     | BLQ ( NC )   | NC ( NC ) |
| Femur              | BLQ ( NC )                                                 | BLQ ( NC )    | BLQ ( NC )     | NC ( NC )    | NC ( NC ) |
| Bone marrow        | 98.24 ( 0.3 )                                              | 176.3 ( 0.5 ) | 31.12 ( 0.5 )  | NC ( NC )    | NC ( NC ) |
| Mammary gland      | 80.92 ( 0.3 )                                              | 93.63 ( 0.3 ) | BLQ ( NC )     | NC ( NC )    | NC ( NC ) |
| Placenta           | 80.65 ( 0.3 )                                              | 213.1 ( 0.6 ) | 46.44 ( 0.7 )  | BLQ ( NC )   | NC ( NC ) |
| Amniotic fluid     | BLQ ( NC )                                                 | BLQ ( NC )    | BLQ ( NC )     | BLQ ( NC )   | NC ( NC ) |
| Fetus              | BLQ ( NC )                                                 | BLQ ( NC )    | BLQ ( NC )     | BLQ ( NC )   | NC ( NC ) |
| Uterus             | 104.1 ( 0.3 )                                              | 526.9 ( 1.4 ) | 441.0 ( 6.9 )  | 542.4 ( NC ) | NC ( NC ) |
| Ovary              | 85.73 ( 0.3 )                                              | 340.4 ( 0.9 ) | 32.41 ( 0.5 )  | NC ( NC )    | NC ( NC ) |
| Stomach            | 167.9 ( 0.5 )                                              | 309.7 ( 0.8 ) | 376.5 ( 5.9 )  | 217.5 ( NC ) | NC ( NC ) |
| Small intestine    | 356.8 ( 1.2 )                                              | 1909 ( 5.2 )  | 1257 ( 19.6 )  | 699.5 ( NC ) | NC ( NC ) |
| Large intestine    | 166.1 ( 0.5 )                                              | 197.8 ( 0.5 ) | 655.1 ( 10.2 ) | 411.4 ( NC ) | NC ( NC ) |

BLQ: Below lower limit of quantification (20 ng eq g<sup>-1</sup>). NC: not evaluated because of the low radioactivity in the case of radioactivity concentration and not calculated in the case of tissue/blood ratio. A linear calibration curve was obtained in the range of 20–20,000 ng eq mL<sup>-1</sup>.

Supplementary Table 3 Pharmacokinetic parameters of radioactivity in the plasma and liver following single oral administration of 1 mg/kg <sup>14</sup>C-OPC-163493 in fasted male rats

| Parameter                            | Plasma | Liver |
|--------------------------------------|--------|-------|
| C <sub>max</sub> (µg eq/mL or g)     | 0.5371 | 2.746 |
| t <sub>max</sub> (h)                 | 2.0    | 4.0   |
| AUC <sub>24h</sub> (µg eq·h/mL or g) | 5.058  | 31.82 |

Supplementary Table 4 HbA1c baseline of ZDF rats at the age of 11 weeks

| Group        | Baseline (%) |
|--------------|--------------|
| Vehicle      | 6.24 ± 0.08  |
| 1 mg/kg/day  | 6.25 ± 0.09  |
| 2 mg/kg/day  | 6.33 ± 0.09  |
| 4 mg/kg/day  | 6.26 ± 0.11  |
| 10 mg/kg/day | 6.33 ± 0.09  |

Data represent mean ± SE (n = 16).

| Supplementary Table 5 Pharmacokinetic parameters of OPC-163493 in ZDF rats |                     |                          |                      |                            |
|----------------------------------------------------------------------------|---------------------|--------------------------|----------------------|----------------------------|
| Daily dose (mg/kg/day)                                                     | Single dose (mg/kg) | C <sub>max</sub> (µg/mL) | t <sub>max</sub> (h) | AUC <sub>t</sub> (µg·h/mL) |
| 1                                                                          | 0.5                 | 0.2948 ± 0.0319          | 11.3 ± 0.7           | 2.925 ± 0.363              |
| 2                                                                          | 1                   | 0.4450 ± 0.0242          | 10.0 ± 1.0           | 4.540 ± 0.284              |
| 4                                                                          | 2                   | 1.193 ± 0.214            | 9.7 ± 1.2            | 9.563 ± 1.258              |
| 10                                                                         | 5                   | 4.082 ± 0.773            | 8.8 ± 0.2            | 34.16 ± 2.99               |

Data represent mean ± SE (n = 3). OPC-163493 suspensions were administered twice at 0 h (9AM) and 8 h (5PM).

Supplementary Table 6 HbA1c baseline of Akita mice at the age of 6 weeks

| Group   | Baseline (%) |
|---------|--------------|
| Control | 7.29 ± 0.16  |
| 0.005%  | 7.18 ± 0.20  |
| 0.01%   | 7.14 ± 0.18  |
| 0.02%   | 7.18 ± 0.19  |

Data represent mean ± SE (n = 12).

| <b>Supplementary Table 7 The Diurnal change of plasma OPC-163493 concentrations in Akita mice following 6-week dietary administration</b> |      |        |         |        |             |
|-------------------------------------------------------------------------------------------------------------------------------------------|------|--------|---------|--------|-------------|
| Group                                                                                                                                     |      | 6 AM   | 12 noon | 6 PM   | 12 midnight |
| 0.005 % OPC-163493                                                                                                                        | mean | 0.7726 | 0.6624  | 0.2517 | 0.8378      |
|                                                                                                                                           | SE   | 0.0592 | 0.0916  | 0.0315 | 0.0428      |
| 0.01% OPC-163493                                                                                                                          | mean | 1.634  | 0.9069  | 0.6717 | 1.647       |
|                                                                                                                                           | SE   | 0.168  | 0.0707  | 0.2254 | 0.288       |
| 0.02% OPC-163493                                                                                                                          | mean | 4.246  | 2.384   | 1.840  | 4.064       |
|                                                                                                                                           | SE   | 0.155  | 0.208   | 0.260  | 0.633       |

Mean and SE in each group at each time point are represented in the table ( $\mu\text{g mL}^{-1}$ , n=3).

Supplementary Table 8 HbA1c baseline of ZDF rats at the age of 27 weeks

| Group        | Baseline (%) |
|--------------|--------------|
| Vehicle      | 10.28 ± 0.27 |
| 2 mg/kg/day  | 10.25 ± 0.06 |
| 6 mg/kg/day  | 10.28 ± 0.20 |
| 10 mg/kg/day | 10.27 ± 0.22 |

Data represent mean ± SE (n = 6).

**Supplementary Table 9 Pharmacokinetic parameters of OPC-163493 in old ZDF rats**

| Compound   | n | Daily dose (mg/kg/day) | Single dose (mg/kg) | C <sub>max</sub> (µg/mL) | T <sub>max</sub> (h) | AUC <sub>0-24</sub> (µg·h/mL) |
|------------|---|------------------------|---------------------|--------------------------|----------------------|-------------------------------|
| OPC-163493 | 3 | 2                      | 1                   | 0.467 ± 0.071            | 9.0 ± 0.0            | 6.05 ± 0.89                   |
|            | 3 | 6                      | 3                   | 1.538 ± 0.256            | 9.5 ± 0.3            | 16.60 ± 1.81                  |
|            | 2 | 10                     | 5                   | 2.268 ± 0.353            | 9.0 ± 0.0            | 18.57 ± 4.30                  |

Data represent mean ± SE. OPC-163493 suspensions were administered twice at 0 h (9AM) and 8 h (5PM).

**Supplementary Table 10 Plasma OPC-163493 concentrations at 6 AM in OLETF rats following 1-week dietary administration**

| Group             |      | 6 AM  |
|-------------------|------|-------|
| 0.01 % OPC-163493 | mean | 0.271 |
|                   | SE   | 0.006 |
| 0.02% OPC-163493  | mean | 0.607 |
|                   | SE   | 0.051 |
| 0.06% OPC-163493  | mean | 2.112 |
|                   | SE   | 0.045 |

Mean and SE at 6AM are represented in the table (µg mL<sup>-1</sup>, n=3).

**Supplementary Table 11 The diurnal change of plasma OPC-163493 concentrations in ZDF(M) rats following 4-week dietary administration**

| Group             |      | 6 AM  | 12 noon | 6 PM  | 12 midnight |
|-------------------|------|-------|---------|-------|-------------|
| 0.04 % OPC-163493 | mean | 4.536 | 4.131   | 3.938 | 4.064       |
|                   | SE   | 0.748 | 0.259   | 0.448 | 0.436       |

Mean and SE at each time point are represented in the table (µg mL<sup>-1</sup>, n=3).

**Supplementary Table 12** HbA1c baseline of ob/ob mice at the age of 8 weeks

| Group   | n | Baseline (%) |
|---------|---|--------------|
| Control | 7 | 4.89 ± 0.10  |
| 0.005%  | 8 | 4.95 ± 0.11  |
| 0.01%   | 8 | 4.95 ± 0.10  |
| 0.02%   | 8 | 4.91 ± 0.12  |

Data represent mean ± SE.

| <b>Supplementary Table 13 Plasma OPC-163493 concentrations at 6 AM in ob/ob mice following 10-week dietary administration</b> |      |       |
|-------------------------------------------------------------------------------------------------------------------------------|------|-------|
| Group                                                                                                                         |      | 6 AM  |
| 0.005 % OPC-163493                                                                                                            | mean | 0.322 |
|                                                                                                                               | SE   | 0.013 |
| 0.01% OPC-163493                                                                                                              | mean | 0.990 |
|                                                                                                                               | SE   | 0.119 |
| 0.02% OPC-163493                                                                                                              | mean | 1.962 |
|                                                                                                                               | SE   | 0.135 |

Mean and SE at 6AM are represented in the table ( $\mu\text{g mL}^{-1}$ , n=3).

**Supplementary Table 14:** Please see Source Data file worksheet “sTable 14”.

| <b>Supplementary Table 15 Pharmacokinetic parameters of OPC-163493 in HDF SD rats</b> |   |                        |                     |                                       |                      |                                                       |
|---------------------------------------------------------------------------------------|---|------------------------|---------------------|---------------------------------------|----------------------|-------------------------------------------------------|
| Compound                                                                              | n | Daily dose (mg/kg/day) | Single dose (mg/kg) | $C_{\text{max}}$ ( $\mu\text{g/mL}$ ) | $T_{\text{max}}$ (h) | $\text{AUC}_{0-24}$ ( $\mu\text{g}\cdot\text{h/mL}$ ) |
| OPC-163493                                                                            | 3 | 2                      | 1                   | 0.640 ± 0.139                         | 10.7 ± 0.7           | 7.24 ± 1.31                                           |
|                                                                                       | 3 | 4                      | 2                   | 1.296 ± 0.081                         | 8.0 ± 3.1            | 17.19 ± 0.97                                          |

Data represent mean ± SE. OPC-163493 suspensions were administered twice at 0 h (9 AM) and 8 h (5 PM).

**Supplementary Table 16 Long-term effect of OPC-163493 dosing with mixed chow on HbA1c values in male OLETF rats**

| Group   | HbA1c (%) |       |        |        |        |        |        |
|---------|-----------|-------|--------|--------|--------|--------|--------|
|         | 0w        | 2w    | 4w     | 8w     | 13w    | 16w    | 20w    |
| Control | 5.41      | 5.22  | 5.28   | 5.86   | 5.85   | 6.03   | 6.06   |
| 0.01%   | 5.47      | 5.15  | 5.24   | 5.85   | 5.81   | 5.81   | 5.80   |
| 0.02%   | 5.45      | 4.99  | 4.88*  | 5.53*  | 5.45*  | 5.62*  | 5.55** |
| 0.06%   | 5.36      | 4.85* | 4.65** | 5.22** | 5.19** | 5.18** | 5.24** |
| LETO    |           |       |        |        |        |        | 3.26## |

Data represent mean (n = 14) except for LETO (n = 6). Significant efficacy was found in the 0.02% and 0.06% OPC-mixed chow-treated groups using a mixed model for repeated measures (MMRM) method followed by Dunnett's test (OPC vs Control chow group, P < 0.01). Treatment-by-time interaction was then estimated by contrast-averaging the corresponding treatment differences at each time point using the MMRM method (\*P < 0.05, \*\*P < 0.01). A significant difference was also observed between the LETO rat group and the OLETF rat (control chow) group using an unpaired t-test (##P < 0.01).

| State                   | Parameter | Group      | Mean ± SE<br>(n = 12) | Difference<br>(OPC - control) | P                 |
|-------------------------|-----------|------------|-----------------------|-------------------------------|-------------------|
|                         |           |            | (mg/kg/min)           |                               | (Unpaired t-test) |
| Basal<br>(-20 - 0 min)  | HGP       | Control    | 8.35 ± 0.75           | -2.52                         | P < 0.05          |
|                         |           | OPC-163493 | 5.83 ± 0.58           |                               |                   |
| Clamp<br>(60 - 120 min) | GIR       | Control    | 12.47 ± 1.30          | 1.33                          | Not significant   |
|                         |           | OPC-163493 | 13.80 ± 1.41          |                               |                   |
|                         | HGP       | Control    | -8.36 ± 1.36          | -1.52                         | Not significant   |
|                         |           | OPC-163493 | -9.88 ± 1.48          |                               |                   |
|                         | Rd        | Control    | 3.91 ± 0.08           | -0.31                         | P < 0.05          |
|                         |           | OPC-163493 | 3.60 ± 0.10           |                               |                   |

**Supplementary Table 18:** Please see Source data file worksheet “sTable 18”.

| <b>Supplementary Table 19 Pharmacokinetic parameters of OPC-163493 in ZDF rats</b> |                            |                                |                            |                                  |
|------------------------------------------------------------------------------------|----------------------------|--------------------------------|----------------------------|----------------------------------|
| <b>Daily dose (mg/kg/day)</b>                                                      | <b>Single dose (mg/kg)</b> | <b>C<sub>max</sub> (µg/mL)</b> | <b>t<sub>max</sub> (h)</b> | <b>AUC<sub>t</sub> (µg·h/mL)</b> |
| 6                                                                                  | 3                          | 1.122 ± 0.165                  | 9.0 ± 0.0                  | 10.64 ± 0.76                     |

Data represent mean ± SE (n = 3). OPC-163493 suspensions were administered twice at 0 h (9 AM) and 8 h (5 PM). Reasonable PK parameters were obtained once more and should be compared with the previous study (Supplementary Table 5).

**Supplementary Table 20:** Please see Source Data file worksheet “sTable 20”.

**Supplementary Table 21 Parameters of OPC-163493 intervention study in salt-loaded SHRSPs (1<sup>st</sup> exp.)**

| Group            | Beginning No. of animals | n    | BW (g)   |       |        |        | SBP (mmHg) |       |                       |                       |
|------------------|--------------------------|------|----------|-------|--------|--------|------------|-------|-----------------------|-----------------------|
|                  |                          |      | Baseline | Day 5 | Day 26 | Day 40 | Baseline   | Day 5 | Day 27                | Day 41                |
| Control          | 16                       | Mean | 139.5    | 179.9 | 256.1  | 272.8  | 174.8      | 174.0 | 242.5                 | 260.5                 |
|                  |                          | SE   | 1.3      | 1.6   | 2.2    | 4.7    | 2.4        | 2.8   | 2.6                   | 4.1                   |
| 0.06% OPC-163493 | 16                       | Mean | 139.4    | 175.6 | 248.8  | 272.0  | 174.8      | 169.0 | 228.3 <sup>\$\$</sup> | 243.5 <sup>\$\$</sup> |
|                  |                          | SE   | 1.5      | 1.6   | 2.7    | 3.5    | 2.1        | 3.3   | 3.0                   | 4.3                   |

  

| Group            | Median days to stroke symptoms | Median days to deaths | Metabolic cage between Day 48 and 49 (24h) |                 |                    |                            | Plasma OPC conc. at 6AM on Day 51 |                   |         |      |
|------------------|--------------------------------|-----------------------|--------------------------------------------|-----------------|--------------------|----------------------------|-----------------------------------|-------------------|---------|------|
|                  |                                |                       | n                                          | Food intake (g) | Water drinking (g) | Urinary albumin volume (g) | Urinary albumin /creatinine       | n                 | (µg/mL) |      |
| Control          | Median                         | 47.5                  | 54.0                                       | Mean            | 5.9                | 60.2                       | 47.0                              | 14.3              |         |      |
|                  | 95% CI                         | 43.0-48.0             | 50.0-58.0                                  | SE              | 2.1                | 5.4                        | 4.2                               | 1.6               |         |      |
| 0.06% OPC-163493 | Median                         | 55.5 <sup>###</sup>   | 63.5 <sup>###</sup>                        | Mean            | 16.5 <sup>**</sup> | 57.8                       | 39.3                              | 4.6 <sup>**</sup> | 7       | 2.48 |
|                  | 95% CI                         | 52.0-56.0             | 60.0-64.0                                  | SE              | 1.1                | 1.9                        | 2.1                               | 1.1               |         |      |

SBP: systolic blood pressure. A significant decrease was found in the overall treatment differences in SBP using the MMRM method (OPC vs Control chow group, P < 0.01); treatment-by-time interaction was then estimated by contrast averaging the corresponding treatment differences at each time point using the MMRM method (<sup>\$\$</sup> P < 0.01). <sup>###</sup> p<0.01, OPC vs Control group (Log-Rank test). <sup>\*\*</sup> p<0.01, OPC vs Control group (unpaired t-test).

**Supplementary Table 22 Parameters of OPC-163493 intervention study in salt-loaded SHRSPs (2<sup>nd</sup> exp.)**

| Group            | Beginning No. of animals | Remaining No. of animals |        |        |        | BW (g) |          |       |        |        |        |        |        |        |  |  |  |  |  |
|------------------|--------------------------|--------------------------|--------|--------|--------|--------|----------|-------|--------|--------|--------|--------|--------|--------|--|--|--|--|--|
|                  |                          | n                        | Day 33 | Day 35 | Day 38 | Day 41 | Baseline | Day 5 | Day 12 | Day 19 | Day 26 | Day 33 | Day 42 | Day 43 |  |  |  |  |  |
| Control          | 10                       | 9                        | 8      | 7      | 7      | Mean   | 131.6    | 179.0 | 215.4  | 236.1  | 251.8  | 254.4  | 244.5  | 237.2  |  |  |  |  |  |
|                  |                          |                          |        |        |        | SE     | 4.3      | 2.6   | 2.8    | 3.3    | 4.0    | 9.9    | 13.9   | 11.7   |  |  |  |  |  |
| 0.02% OPC-163493 | 10                       | 10                       | 9      | 9      | 8      | Mean   | 131.6    | 172.4 | 205.9  | 230.2  | 248.3  | 256.5  | 253.8  | 249.7  |  |  |  |  |  |
|                  |                          |                          |        |        |        | SE     | 3.0      | 2.8   | 5.9    | 5.5    | 5.5    | 6.6    | 10.1   | 10.8   |  |  |  |  |  |
| 0.06% OPC-163493 | 10                       | 10                       | 10     | 10     | 10     | Mean   | 131.4    | 176.2 | 208.5  | 230.2  | 245.3  | 257.2  | 254.8  | 252.7  |  |  |  |  |  |
|                  |                          |                          |        |        |        | SE     | 5.5      | 3.7   | 3.7    | 2.8    | 3.0    | 3.2    | 6.9    | 7.9    |  |  |  |  |  |

  

| Group            | Food intake (g) |        |        |        |        |        |        |        |       |       |       |        |        |        | Water drinking (g) |        |        |        |        |        |        |        |        |        |      |  |  |  |
|------------------|-----------------|--------|--------|--------|--------|--------|--------|--------|-------|-------|-------|--------|--------|--------|--------------------|--------|--------|--------|--------|--------|--------|--------|--------|--------|------|--|--|--|
|                  | Day 9           | Day 16 | Day 19 | Day 26 | Day 30 | Day 33 | Day 37 | Day 42 | Day 2 | Day 5 | Day 9 | Day 12 | Day 16 | Day 19 | Day 23             | Day 26 | Day 28 | Day 30 | Day 33 | Day 35 | Day 37 | Day 39 | Day 41 | Day 42 |      |  |  |  |
| Control          | Mean            | 16.8   | 18.5   | 19.2   | 18.8   | 17.3   | 16.4   | 16.5   | 12.4  | 35.4  | 36.7  | 40.5   | 43.8   | 48.1   | 51.0               | 48.1   | 53.1   | 57.9   | 50.9   | 58.5   | 61.2   | 59.6   | 61.6   | 78.7   | 67.6 |  |  |  |
|                  | SE              | 0.2    | 0.3    | 0.3    | 0.4    | 0.8    | 1.8    | 1.9    | 1.8   | 1.4   | 1.6   | 1.6    | 1.6    | 2.5    | 2.8                | 2.2    | 2.4    | 2.4    | 2.9    | 6.0    | 4.2    | 7.7    | 8.3    | 6.4    | 6.8  |  |  |  |
| 0.02% OPC-163493 | Mean            | 15.8   | 18.2   | 19.3   | 19.6   | 19.3   | 18.6   | 18.2   | 15.7  | 35.6  | 36.2  | 36.9   | 40.7   | 42.3   | 45.1               | 42.3   | 45.4   | 51.6   | 45.3   | 49.0   | 46.7   | 45.2   | 46.3   | 51.0   | 48.0 |  |  |  |
|                  | SE              | 0.3    | 0.4    | 0.4    | 0.5    | 0.5    | 1.4    | 1.0    | 1.6   | 1.6   | 1.6   | 1.5    | 1.8    | 2.2    | 2.5                | 2.3    | 2.3    | 2.8    | 3.1    | 1.8    | 3.5    | 7.7    | 4.4    | 5.4    | 8.3  |  |  |  |
| 0.06% OPC-163493 | Mean            | 16.1   | 18.1   | 19.4   | 19.6   | 19.3   | 19.5   | 18.1   | 16.9  | 34.2  | 35.5  | 35.4   | 37.7   | 38.5   | 42.8               | 37.7   | 49.5   | 51.2   | 43.3   | 54.1   | 51.2   | 45.6   | 57.1   | 56.9   | 45.6 |  |  |  |
|                  | SE              | 0.3    | 0.2    | 0.2    | 0.3    | 0.3    | 0.4    | 0.8    | 1.4   | 1.7   | 1.7   | 1.3    | 1.1    | 1.5    | 1.4                | 4.1    | 3.1    | 2.7    | 1.8    | 3.2    | 2.9    | 7.4    | 2.4    | 3.9    | 3.7  |  |  |  |

  

| Group            | SBP (mmHg) |        |        |                       | Metabolic cage between Day 43 and 43 (24h) |                 |                    |                    | Renal functions             |                           |                                       |             | Plasma OPC conc. at 6AM on Day 35 |         |
|------------------|------------|--------|--------|-----------------------|--------------------------------------------|-----------------|--------------------|--------------------|-----------------------------|---------------------------|---------------------------------------|-------------|-----------------------------------|---------|
|                  | Base-line  | Day 14 | Day 28 | Day 41                | n                                          | Food intake (g) | Water drinking (g) | Urinary volume (g) | Urinary albumin /creatinine | Plasma creatinine (mg/dL) | Creatinine clearance (mL/min/100g BW) | BUN (mg/dL) | n                                 | (µg/mL) |
| Control          | Mean       | 176.4  | 202.9  | 248.6                 | 7                                          | 9.1             | 59.9               | 34.4               | 16.1                        | 0.34                      | 0.44                                  | 29.2        |                                   |         |
|                  | SE         | 5.2    | 4.0    | 6.4                   |                                            | 1.5             | 12.4               | 7.8                | 1.3                         | 0.02                      | 0.03                                  | 3.7         |                                   |         |
| 0.02% OPC-163493 | Mean       | 177.4  | 194.0  | 238.3                 | 8                                          | 11.9            | 53.7               | 24.8               | 9.1                         | 0.28                      | 0.54                                  | 19.1**      | 5                                 | 0.67    |
|                  | SE         | 6.5    | 3.9    | 4.6                   |                                            | 2.7             | 10.1               | 7.7                | 3.0                         | 0.02                      | 0.04                                  | 0.8         |                                   | 0.05    |
| 0.06% OPC-163493 | Mean       | 174.7  | 187.9  | 226.5 <sup>\$\$</sup> | 10                                         | 15.6            | 45.3               | 16.8               | 6.0*                        | 0.25**                    | 0.60*                                 | 21.5*       | 5                                 | 3.14    |
|                  | SE         | 5.8    | 3.2    | 4.7                   |                                            | 1.9             | 3.2                | 2.4                | 2.4                         | 0.02                      | 0.05                                  | 1.2         |                                   | 0.16    |

# p<0.05, ## p<0.01, OPC vs Control group (using the MMRM method followed by Dunnett's test).

\$\$ p<0.01, OPC vs Control group (comparison of treatment-by-time interaction at each time point using the post-hoc test of the MMRM method). \* p<0.05, \*\* p<0.01, OPC vs Control group (Dunnett's test).

**Supplementary Table 23 Sensitization of OPC-163493 to NP-induced relaxation of rat aortas**

|      | Intact aorta (n = 10) |                 |        |       | Endothelium-rubbed aorta (n = 10) |                 |        |       |      |
|------|-----------------------|-----------------|--------|-------|-----------------------------------|-----------------|--------|-------|------|
|      | EC <sub>50</sub>      | L95%CL (nmol/L) | U95%CL | -fold | EC <sub>50</sub>                  | L95%CL (nmol/L) | U95%CL | -fold |      |
| DMSO | 36.14                 | 23.60           | 55.34  | 6.59  | DMSO                              | 4.318           | 3.240  | 5.755 | 3.22 |
| OPC  | 5.487                 | 3.106           | 9.691  |       | OPC                               | 1.342           | 0.988  | 1.821 |      |

EC<sub>50</sub> values were estimated by regression analysis (NP concentrations were subjected to Log transformation).



**Supplementary Table 24 Summary of 4-week repeated oral dosing toxicity study in rats**

| Dose (mg/kg)                   | 30            | 100  |                                  | 300                                                                     |                                                       |
|--------------------------------|---------------|------|----------------------------------|-------------------------------------------------------------------------|-------------------------------------------------------|
| Sex and Number of Animals      | M:10<br>F: 10 | F:10 | M: 10                            | F: 15                                                                   | M:15                                                  |
| Death                          | -             | -    | -                                | 4/15                                                                    | -                                                     |
| General Condition, Body Weight | -             | -    | -                                | Salivation,<br>Body weight gain↓                                        | Salivation,<br>Body weight gain↓<br>Body temperature↑ |
| Hematology                     | -             | -    | Hb,<br>Ht, ↑                     | RET ↑<br>Eos↓                                                           | Hb, Ht, RBC ↑<br>Neut, Eos↓                           |
| Blood biochemistry             | -             | -    | -                                | ALT, ALP, TBI, CHO,<br>PL, TG↑                                          | AST, ALT, ALP, TBI, CHO,<br>PL, BUN ↑                 |
| Histopathological Change       | -             | -    | Liver: Hypertrophy of hepatocyte |                                                                         |                                                       |
|                                |               |      | -                                | Liver: Granular eosinophilic cytoplasm<br>Pancreas: Islet cell necrosis |                                                       |
|                                |               |      |                                  | Kidney: Hyperplasia<br>(transitional cells &<br>urinary bladder)        | Liver: Focal Necrosis                                 |
| TK parameters:Day28            | M             |      |                                  |                                                                         |                                                       |
| Cmax (mg/mL)                   | 12.0          | 49.4 | 33.5                             | 91.8                                                                    | 91.7                                                  |
| Tmax (h)                       | 2             | 2    | 2                                | 2                                                                       | 4                                                     |
| AUC24h (mg*h/mL)               | 100           | 398  | 369                              | 1183                                                                    | 1400                                                  |
|                                | F             |      |                                  |                                                                         |                                                       |
|                                | 16.8          |      |                                  |                                                                         |                                                       |
|                                | 2             |      |                                  |                                                                         |                                                       |
|                                | 95            |      |                                  |                                                                         |                                                       |

**Supplementary Table 25 Summary of 13-week repeated oral dosing toxicity study in rats**

| Dose (mg/kg)              | 10            | 30             | 100            |
|---------------------------|---------------|----------------|----------------|
| Sex and Number of Animals | M:10<br>F: 10 | M: 10<br>F: 10 | M: 10<br>F: 10 |
| Death                     | -             | -              | -              |
| General Condition         | -             | -              | -              |
| Hematology                | -             | -              | -              |
| Blood biochemistry        | -             | -              | -              |
| Histopathological change  | -             | -              | -              |
| TK parameters: Day91      | M             | M              | M              |
| Cmax (mg/mL)              | 4.7           | 15.9           | 36.2           |
| Tmax (h)                  | 1             | 2              | 4              |
| AUC24h (mg*h/mL)          | 43            | 144            | 459            |
|                           | F             | F              | F              |
|                           | 6.6           | 20.1           | 56.2           |
|                           | 2             | 2              | 1              |
|                           | 50            | 164            | 477            |

No toxicological change was observed.

**Supplementary Table 26 Toxic changes observed with a four-week, repeated oral dosing toxicity study in rats.**

**Body temperature (rectal temperature)**

Sex: Male Unit: °C (Mean ± SD)

| Dose (mg/kg)<br>Stage | Number of<br>Animals | Time | 0 (control)  | 30           | 100          | 300            |
|-----------------------|----------------------|------|--------------|--------------|--------------|----------------|
| Week 2                | 5                    | Pre  | 37.30 ± 0.30 | 37.48 ± 0.22 | 37.28 ± 0.34 | 36.38 ± 0.22** |
|                       |                      | 4h   | 36.62 ± 0.33 | 36.60 ± 0.39 | 36.78 ± 0.30 | 37.76 ± 0.63** |
| Week 4                | 5                    | Pre  | 36.64 ± 0.35 | 36.72 ± 0.70 | 36.22 ± 0.74 | 36.50 ± 0.27   |
|                       |                      | 4h   | 35.98 ± 0.34 | 35.84 ± 0.42 | 36.00 ± 0.32 | 36.68 ± 0.28** |

\*P<0.05, \*\*P<0.01 vs control group.

When significant (P<0.05) difference was found in one-way ANOVA, Dunnett's test was followed for comparisons between the vehicle control and treated groups.

**Body weight gain (Base: Day 1)**

Sex: Male Unit: g

| Dose (mg/kg)      | 0 (control)  | 30           | 100          | 300            |
|-------------------|--------------|--------------|--------------|----------------|
| Number of Animals | 15           | 10           | 10           | 15             |
|                   | Mean ± SD    | Mean ± SD    | Mean ± SD    | Mean ± SD      |
| Day               | n            | n            | n            | n              |
| 8                 | 53.5 ± 10.2  | 54.8 ± 8.1   | 53.0 ± 9.4   | 39.5 ± 11.4**  |
|                   | 15           | 10           | 10           | 15             |
| 15                | 100.7 ± 21.5 | 99.9 ± 13.6  | 96.5 ± 17.7  | 76.9 ± 21.5**  |
|                   | 15           | 10           | 10           | 15             |
| 22                | 141.4 ± 31.8 | 141.6 ± 16.7 | 135.8 ± 26.2 | 105.6 ± 29.0** |
|                   | 15           | 10           | 10           | 15             |
| 28                | 168.4 ± 38.3 | 168.0 ± 20.6 | 159.8 ± 33.1 | 118.6 ± 31.2** |
|                   | 15           | 10           | 10           | 15             |

Sex: Female Unit: g

| Dose (mg/kg)      | 0 (control) | 30          | 100         | 300          |
|-------------------|-------------|-------------|-------------|--------------|
| Number of Animals | 15          | 10          | 10          | 15           |
|                   | Mean ± SD   | Mean ± SD   | Mean ± SD   | Mean ± SD    |
| Day               | n           | n           | n           | n            |
| 8                 | 22.2 ± 5.5  | 20.8 ± 5.2  | 17.5 ± 4.5  | 19.5 ± 5.4   |
|                   | 15          | 10          | 10          | 15           |
| 15                | 39.7 ± 6.7  | 37.7 ± 8.5  | 34.8 ± 5.9  | 32.2 ± 9.5   |
|                   | 15          | 10          | 10          | 15           |
| 22                | 55.2 ± 11.2 | 54.1 ± 10.6 | 53.4 ± 10.4 | 31.8 ± 35.5* |
|                   | 15          | 10          | 10          | 15           |
| 28                | 66.6 ± 12.4 | 64.0 ± 11.4 | 60.7 ± 12.1 | 54.6 ± 13.4  |
|                   | 15          | 10          | 10          | 12           |

\*P<0.05, \*\*P<0.01 vs control group.

When significant (P<0.05) difference was found in one-way ANOVA, Dunnett's test was followed for comparisons between the vehicle control and treated groups.

### Hematology

| Sex: Male                                 |                     | Stage: Week 4       |                      |                      |  |
|-------------------------------------------|---------------------|---------------------|----------------------|----------------------|--|
| Dose (mg/kg)                              | 0 (control)         | 30                  | 100                  | 300                  |  |
| Number of Animals                         | 10                  | 10                  | 10                   | 10                   |  |
|                                           | Mean ± SD           | Mean ± SD           | Mean ± SD            | Mean ± SD            |  |
| Item (unit)                               | n                   | n                   | n                    | n                    |  |
| Hb (g/dL)                                 | 15.10 ± 0.34<br>10  | 15.27 ± 0.70<br>10  | 15.99 ± 0.68**<br>10 | 16.50 ± 0.71**<br>9  |  |
| Ht (%)                                    | 45.11 ± 1.19<br>10  | 45.98 ± 2.03<br>10  | 47.16 ± 1.90*<br>10  | 49.03 ± 2.08**<br>9  |  |
| RBC (x10 <sup>6</sup> /mm <sup>3</sup> )  | 7.714 ± 0.277<br>10 | 7.772 ± 0.314<br>10 | 7.954 ± 0.290<br>10  | 8.294 ± 0.383**<br>9 |  |
| Neut (x10 <sup>3</sup> /mm <sup>3</sup> ) | 1.790 ± 0.439<br>10 | 1.562 ± 0.482<br>10 | 1.293 ± 0.286*<br>10 | 1.337 ± 0.326*<br>9  |  |
| Eos (x10 <sup>3</sup> /mm <sup>3</sup> )  | 0.093 ± 0.018<br>10 | 0.095 ± 0.035<br>10 | 0.093 ± 0.037<br>10  | 0.053 ± 0.014*<br>9  |  |

| Sex: Female                              |                      | Stage: Week 4        |                      |                       |  |
|------------------------------------------|----------------------|----------------------|----------------------|-----------------------|--|
| Dose (mg/kg)                             | 0 (control)          | 30                   | 100                  | 300                   |  |
| Number of Animals                        | 10                   | 10                   | 10                   | 15                    |  |
|                                          | Mean ± SD            | Mean ± SD            | Mean ± SD            | Mean ± SD             |  |
| Item (unit)                              | n                    | n                    | n                    | n                     |  |
| RET (x10 <sup>4</sup> /mm <sup>3</sup> ) | 15.478 ± 3.581<br>10 | 17.239 ± 3.946<br>10 | 17.876 ± 4.066<br>10 | 27.253 ± 7.421**<br>7 |  |
| Eos (x10 <sup>3</sup> /mm <sup>3</sup> ) | 0.102 ± 0.036<br>10  | 0.063 ± 0.023*<br>10 | 0.104 ± 0.041<br>10  | 0.051 ± 0.023**<br>7  |  |

\*P<0.05, \*\*P<0.01 vs control group.

When significant (P<0.05) difference was found in one-way ANOVA, Dunnett's test was followed for comparisons between the vehicle control and treated groups.

### Blood biochemistry

| Sex: Male         |                     | Stage: Week 4       |                     |                       |  |
|-------------------|---------------------|---------------------|---------------------|-----------------------|--|
| Dose (mg/kg)      | 0 (control)         | 30                  | 100                 | 300                   |  |
| Number of Animals | 10                  | 10                  | 10                  | 10                    |  |
|                   | Mean ± SD           | Mean ± SD           | Mean ± SD           | Mean ± SD             |  |
| Item (unit)       | n                   | n                   | n                   | n                     |  |
| AST (IU/L)        | 59.1 ± 4.3<br>10    | 67.2 ± 6.5<br>10    | 70.9 ± 13.3<br>10   | 80.6 ± 15.2**<br>10   |  |
| ALT (IU/L)        | 23.9 ± 3.6<br>10    | 24.4 ± 1.3<br>10    | 26.3 ± 3.9<br>10    | 39.8 ± 9.2**<br>10    |  |
| ALP (IU/L)        | 547.4 ± 111.3<br>10 | 545.8 ± 129.3<br>10 | 563.6 ± 102.3<br>10 | 830.6 ± 230.7**<br>10 |  |
| TBI (mg/dL)       | 0.02 ± 0.04<br>10   | 0.01 ± 0.03<br>10   | 0.04 ± 0.05<br>10   | 0.10 ± 0.05**<br>10   |  |
| CHO (mg/dL)       | 58.1 ± 8.4<br>10    | 64.3 ± 10.1<br>10   | 67.5 ± 12.8<br>10   | 85.5 ± 22.1**<br>10   |  |
| PL (mg/dL)        | 92.0 ± 10.1<br>10   | 100.2 ± 12.5<br>10  | 95.7 ± 13.4<br>10   | 110.6 ± 19.7*<br>10   |  |
| BUN (mg/dL)       | 15.11 ± 2.85<br>10  | 15.01 ± 2.17<br>10  | 15.82 ± 2.03<br>10  | 19.50 ± 2.45**<br>10  |  |

| Sex: Female       |                    | Stage: Week 4      |                    |                     |  |
|-------------------|--------------------|--------------------|--------------------|---------------------|--|
| Dose (mg/kg)      | 0 (control)        | 30                 | 100                | 300                 |  |
| Number of Animals | 10                 | 10                 | 10                 | 15                  |  |
|                   | Mean ± SD          | Mean ± SD          | Mean ± SD          | Mean ± SD           |  |
| Item (unit)       | n                  | n                  | n                  | n                   |  |
| ALT (IU/L)        | 17.1 ± 2.0<br>10   | 18.3 ± 3.7<br>10   | 17.0 ± 1.8<br>10   | 26.0 ± 12.4*<br>7   |  |
| ALP (IU/L)        | 289.0 ± 35.8<br>10 | 273.0 ± 51.9<br>10 | 278.9 ± 64.4<br>10 | 421.1 ± 88.4**<br>7 |  |
| TBI (mg/dL)       | 0.01 ± 0.03<br>10  | 0.04 ± 0.05<br>10  | 0.07 ± 0.05<br>10  | 0.20 ± 0.10**<br>7  |  |
| CHO (mg/dL)       | 63.4 ± 10.8<br>10  | 63.7 ± 13.9<br>10  | 74.8 ± 10.0<br>10  | 109.6 ± 19.0**<br>7 |  |
| PL (mg/dL)        | 112.4 ± 15.6<br>10 | 108.7 ± 17.1<br>10 | 121.3 ± 13.1<br>10 | 158.9 ± 19.2**<br>7 |  |
| TG (mg/dL)        | 16.2 ± 8.0<br>10   | 16.5 ± 9.2<br>10   | 23.4 ± 10.7<br>10  | 52.6 ± 27.7**<br>7  |  |

\*P<0.05, \*\*P<0.01 vs control group.

When significant (P<0.05) difference was found in one-way ANOVA, Dunnett's test was followed for comparisons between the vehicle control and treated groups.

**Supplementary Table 27 Inhibitory effect of OPC-163493 on radioligand binding to various receptors, ion channels and transporters**

| Assay name                            | Inhibition (%) |                                                                        |
|---------------------------------------|----------------|------------------------------------------------------------------------|
|                                       | OPC-163493     | Positive substance                                                     |
| $\alpha$ 1A-Adrenergic                | 0.00           | 100.00 (Prazosin)                                                      |
| $\alpha$ 1B-Adrenergic                | 3.63           | 100.00 (Prazosin)                                                      |
| $\alpha$ 2A-Adrenergic (Human)        | 0.00           | 100.00 (Rauwolscine)                                                   |
| $\alpha$ 2B-Adrenergic (Human)        | 0.00           | 100.00 (Rauwolscine)                                                   |
| $\alpha$ 2C-Adrenergic (Human)        | 0.00           | 100.00 (Rauwolscine)                                                   |
| $\beta$ 1-Adrenergic (Human)          | 8.84           | 99.70 (( $\pm$ )-Propranolol)                                          |
| $\beta$ 2-Adrenergic (Human)          | 0.00           | 99.58 (( $\pm$ )-Propranolol)                                          |
| Bradykinin B1 (Human)                 | 22.68          | 100.00 (Lys-(des-Arg <sup>9</sup> , Leu <sup>8</sup> )-<br>Bradykinin) |
| Bradykinin B2 (Human)                 | 3.90           | 99.28 (HOE140)                                                         |
| Ca Channel (Type L, Benzothiazepine)  | 0.00           | 94.41 ((+)- <i>cis</i> -Diltiazem)                                     |
| Ca Channel (Type L, Dihydropyridine)  | 4.23           | 98.75 (Nitrendipine)                                                   |
| Ca Channel (Type L, Phenylalkylamine) | 0.00           | 95.22 (( $\pm$ )-Methoxyverapamil)                                     |
| Ca Channel (Type N)                   | 24.23          | 100.00 ( $\omega$ -Conotoxin GVIA)                                     |
| Cannabinoid CB1 (Human)               | 1.33           | 94.58 (( <i>R</i> )-(+)-WIN55212-2)                                    |
| Cannabinoid CB2 (Human)               | 14.15          | 100.00 (( <i>R</i> )-(+)-WIN55212-2)                                   |
| CRF1 (Human)                          | 0.00           | 99.95 (Urocortin human)                                                |
| Dopamine D1 (Human)                   | 0.00           | 100.00 ( <i>R</i> (+)-SCH-23390)                                       |
| Dopamine D2 short (Human)             | 0.00           | 100.00 ((+)-Butaclamol)                                                |
| Dopamine D3 (Human)                   | 27.27          | 100.00 (( $\pm$ )-7-OH-DPAT)                                           |
| Dopamine D4.2 (Human)                 | 0.00           | 94.38 (Haloperidol)                                                    |
| Dopamine D5 (Human)                   | 35.04          | 100.00 ( <i>R</i> (+)-SCH-23390)                                       |
| Dopamine transporter (Human)          | 1.32           | 100.00 (GBR12909)                                                      |
| Endothelin ETA (Human)                | 46.60          | 98.77 (Endothelin-1)                                                   |
| Endothelin ETB (Human)                | 1.84           | 100.00 (Endothelin-1)                                                  |
| GABA A (Agonist site)                 | 0.00           | 94.65 (Muscimol)                                                       |
| GABA A (BZ central)                   | 2.33           | 100.00 (Diazepam)                                                      |
| GABA A (Chloride channel)             | 6.20           | 100.00 (Picrotoxin)                                                    |
| GABA B                                | 4.36           | 99.63 (GABA)                                                           |
| GABA transporter                      | 7.24           | 100.00 (GABA)                                                          |
| Glucocorticoid (Human)                | 2.20           | 100.00 (Dexamethasone)                                                 |

**Supplementary Table 27 Continued**

| Assay name                    | Inhibition (%) |                                           |
|-------------------------------|----------------|-------------------------------------------|
|                               | OPC-163493     | Positive substance                        |
| Glutamate (AMPA)              | 0.00           | 99.97 ((S)-AMPA)                          |
| Glutamate (Kainate)           | 9.51           | 95.91 (Kainic acid)                       |
| Glutamate (NMDA agonist site) | 4.93           | 98.95 (L-Glutamic acid)                   |
| Glutamate (NMDA glycine site) | 22.46          | 95.18 (MDL105,519)                        |
| Histamine H1 (Human)          | 0.00           | 99.82 (Pyrilamine)                        |
| Histamine H2 (Human)          | 0.00           | 98.99 (Cimetidine)                        |
| Histamine H3 (Human)          | 0.00           | 98.95 ((R)(-)- $\alpha$ -Methylhistamine) |
| K Channel KATP                | 3.56           | 100.00 (Glibenclamide)                    |
| K Channel SkCa                | 14.73          | 100.00 (Apamin)                           |
| Leukotriene B4                | 6.22           | 96.38 (Leukotriene B <sub>4</sub> )       |
| Leukotriene D4                | 14.68          | 99.24 (Leukotriene D <sub>4</sub> )       |
| Melatonin MT1 (Human)         | 5.36           | 100.00 (Melatonin)                        |
| Muscarinic M1 (Human)         | 12.96          | 100.00 (Atropine)                         |
| Muscarinic M2 (Human)         | 16.10          | 100.00 (Atropine)                         |
| Muscarinic M3 (Human)         | 2.92           | 100.00 (Atropine)                         |
| Muscarinic M4 (Human)         | 4.36           | 100.00 (Atropine)                         |
| Muscarinic M5 (Human)         | 1.86           | 99.75 (Atropine)                          |
| Neurokinin NK1 (Human)        | 17.28          | 98.61 (L-703,606)                         |
| Neurokinin NK2 (Human)        | 8.32           | 100.00 (Neurokinin A)                     |
| Nicotinic (Human)             | 17.42          | 100.00 (( $\pm$ )-Epibatidine)            |
| Opiate $\delta$ (Human)       | 11.55          | 99.84 (Naltriben)                         |
| Opiate $\kappa$ (Human)       | 9.14           | 100.00 (U-69593)                          |
| Opiate $\mu$ (Human)          | 15.33          | 100.00 (DAMGO)                            |
| Opiate ORL1 (Human)           | 10.49          | 98.21 (Nociceptin human)                  |
| Prostanoid EP2 (Human)        | 0.00           | 100.00 (Prostaglandin E2)                 |
| Serotonin 5HT1A (Human)       | 11.79          | 97.95 (Serotonin)                         |
| Serotonin 5HT2A (Human)       | 0.00           | 99.23 (Ketanserin)                        |
| Serotonin 5HT3 (Human)        | 0.00           | 100.00 (Tropisetron)                      |
| Serotonin transporter (Human) | 0.00           | 99.43 (Imipramine)                        |

Test substance concentration:  $1 \times 10^{-5}$  M, Positive substance concentration:  $1 \times 10^{-6}$  or  $1 \times 10^{-5}$  M. Data are expressed as the mean values of duplicate samples. The inhibition ratio was calculated from "100-binding ratio," binding ratio:  $[(B - N) / (B_0 - N)] \times 100$  (%), B: Bound radioactivity in the presence of test substance (individual value), B<sub>0</sub>: Total bound radioactivity in the absence of test substance (mean value), N: Non-specific bound radioactivity (mean value).

## Supplementary Discussions

**Supplementary Discussion 1:** Speculating further, SDH might be partly reversed in the direction of reducing fumarate to succinate, because it consequently provides oxidized Coenzyme Q to Complex I and promotes the circulation of the quinone pool<sup>1</sup>. As an anaplerotic response to the TCA cycle alteration, aspartate utilization for replenishment was in particular markedly activated. As a similar response, it was reported that aspartate utilization is essential for survival and growth of cancer cells when the TCA cycle was disrupted by the inhibition of 2-OG dehydrogenase <sup>2</sup>.

**Supplementary Discussion 2:** Superoxide reacts with NO to form peroxynitrite (ONOO<sup>-</sup>), which reduces NO bioavailability. ONOO<sup>-</sup> itself also oxidizes tetrahydrobiopterin (BH<sub>4</sub>), an essential cofactor of endothelial NO synthase (eNOS). This oxidization causes dysregulation of eNOS, known as eNOS uncoupling (different from mUncoupling). This in turn results in impaired NO release and leads to further superoxide production, setting up a vicious cycle and subsequent endothelial dysfunction<sup>3</sup>.

## Supplementary References

1. Chouchani, E.T., *et al.* Ischaemic accumulation of succinate controls reperfusion injury through mitochondrial ROS. *Nature* **515**, 431-435 (2014).
2. Allen, E.L., *et al.* Differential Aspartate Usage Identifies a Subset of Cancer Cells Particularly Dependent on OGDH. *Cell Rep* **17**, 876-890 (2016).
3. Kietadisorn, R., Juni, R.P. & Moens, A.L. Tackling endothelial dysfunction by modulating NOS uncoupling: new insights into its pathogenesis and therapeutic possibilities. *Am J Physiol Endocrinol Metab* **302**, E481-495 (2012).
